# Modeling Cell-Specific Dynamics and Regulation of the Common Gamma Chain Cytokines

Ali M. Farhat<sup>a,c</sup>, Adam C. Weiner<sup>a,c</sup>, Cori Posner<sup>b</sup>, Zoe S. Kim<sup>a</sup>, Brian  
Orcutt-Jahns<sup>a</sup>, Scott M. Carlson<sup>b</sup>, and Aaron S. Meyer<sup>a,d</sup>

<sup>a</sup>*Department of Bioengineering, Jonsson Comprehensive Cancer Center, Eli  
and Edythe Broad Center of Regenerative Medicine and Stem Cell Research;  
University of California, Los Angeles*

<sup>b</sup>*Visterra, Inc., Waltham, MA*

<sup>c</sup>*These authors contributed equally to this work*

<sup>d</sup>*a@asmlab.org*

## Abstract

Many receptor families exhibit both pleiotropy and redundancy in their regulation, with multiple ligands, receptors, and responding cell populations. Any intervention, therefore, has multiple effects, confounding intuition about how to precisely manipulate signaling for therapeutic purposes. The common  $\gamma$ -chain cytokine receptor dimerizes with complexes of the cytokines interleukin (IL)-2, IL-4, IL-7, IL-9, IL-15, and IL-21 and their corresponding “private” receptors. These cytokines have existing uses and future potential as immune therapies due to their ability to regulate the abundance and function of specific immune cell populations. However, engineering cell specificity into a therapy is confounded by the complexity of the family across responsive cell types. Here, we build a binding-reaction model for the ligand-receptor interactions of common  $\gamma$ -chain cytokines enabling quantitative predictions of response. We show that accounting for receptor-ligand trafficking is essential to accurately model cell response. This model accurately predicts ligand response across a wide panel of cell types under diverse experimental designs. Further, we can predict the effect and specificity of natural or engineered ligands across cell types. We then show that tensor factorization is a uniquely powerful tool to visualize changes

28 in the input-output behavior of the family across time, cell types, ligands, and con-  
29 centration. In total, these results present a more accurate model of ligand response  
30 validated across a panel of immune cell types, and demonstrate an approach for  
31 generating interpretable guidelines to manipulate the cell type-specific targeting of  
32 engineered ligands. These techniques will in turn help to study and therapeutically  
33 manipulate many other complex receptor-ligand families.

## 34 **Summary points**

- 35 • A dynamical model of the  $\gamma$ -chain cytokines accurately models responses to IL-2,  
36 IL-15, IL-4, and IL-7.
- 37 • Receptor trafficking is necessary for capturing ligand response.
- 38 • Tensor factorization maps responses across cell populations, receptors, cytokines,  
39 and dynamics to visualize cytokine specificity.
- 40 • An activation model coupled with tensor factorization provides design specifica-  
41 tions for engineering cell-specific responses.

## 42 **Introduction**

43 Cytokines are cell signaling proteins responsible for cellular communication within the  
44 immune system. The common  $\gamma$ -chain ( $\gamma_c$ ) receptor cytokines, including interleukin  
45 (IL)-2, 4, 7, 9, 15, and 21, are integral for modulating both innate and adaptive im-  
46 mune responses. As such, they have existing uses and future potential as immune  
47 therapies.<sup>1,2</sup> Each ligand binds to its specific private receptors before interacting with  
48 the common  $\gamma_c$  receptor to induce signaling.<sup>3</sup>  $\gamma_c$  receptor signaling induces lymphopro-  
49 liferation, offering a mechanism for selectively expanding or repressing immune cell  
50 types.<sup>4,5</sup> Consequently, loss-of-function or reduced activity mutations in the  $\gamma_c$  recep-  
51 tor can cause severe combined immunodeficiency (SCID) due to insufficient T and NK  
52 cell maturation.<sup>6</sup> Deletion or inactivating mutations in IL-2 or its private receptors leads  
53 to more selective effects, including diminished regulatory T cell ( $T_{reg}$ ) proliferation and  
54 loss of self-tolerance.<sup>7-9</sup> Deficiency in the IL-2 receptor  $IL-2R\alpha$  also causes hyperpro-  
55 liferation in CD8+ T cells, but diminished antigen response.<sup>10</sup> These examples show

56 how  $\gamma_C$  receptor cytokines coordinate a dynamic balance of immune cell abundance  
57 and function.

58 The  $\gamma_C$  cytokines' ability to regulate lymphocytes can impact both solid and hemato-  
59 logical tumors.<sup>11</sup> IL-2 is an approved, effective therapy for metastatic melanoma, and  
60 the antitumor effects of IL-2 and IL-15 have been explored in combination with other  
61 treatments.<sup>12,13</sup> Nonetheless, understanding these cytokines' regulation is stymied by  
62 their complex binding and activation mechanism.<sup>3</sup> Any intervention imparts effects  
63 across multiple distinct cell populations, with each population having a unique re-  
64 sponse defined by its receptor expression.<sup>14,15</sup> These cytokines' potency is largely  
65 limited by the severe toxicities, such as deadly vascular leakage with IL-2.<sup>16</sup> Finally,  
66 IL-2 and IL-15 are rapidly cleared renally and by receptor-mediated endocytosis, limit-  
67 ing their half-life *in vivo*.<sup>17-19</sup>

68 To address the limitations of natural ligands, engineered proteins have been produced  
69 with potentially beneficial properties.<sup>2</sup> The most common approach has been to de-  
70 velop mutant ligands by modulating the binding kinetics for specific receptors.<sup>20,21</sup> For  
71 example, mutant IL-2 forms with a higher binding affinity for IL-2R $\beta$ , or reduced bind-  
72 ing to IL-2R $\alpha$ , induce greater cytotoxic T cell proliferation, antitumor responses, and  
73 proportionally less T<sub>reg</sub> expansion.<sup>12,22</sup> This behavior can be understood through IL-2's  
74 typical mode of action, in which T<sub>reg</sub>s are sensitized to IL-2 by expression of IL-2R $\alpha$ .<sup>14</sup>  
75 Bypassing this sensitization mechanism thus shifts cell-specificity.<sup>22</sup> Conversely, mu-  
76 tants skewed toward IL-2R $\alpha$  over IL-2R $\beta$  binding selectively expand T<sub>reg</sub> populations,  
77 over cytotoxic T cells and NK cells, compared to native IL-2.<sup>23,24</sup>

78 The therapeutic potential and complexity of this family make computational models  
79 especially valuable for rational engineering. Early attempts at mathematically mod-  
80 eling the synergy between IL-2 and IL-4 in B and T cells successfully identified a phe-  
81 nomenological model that could capture the synergy between the two cytokines.<sup>25</sup> A  
82 cell population model has explained how T<sub>reg</sub> IL-2 consumption suppresses effector T  
83 cell activation.<sup>26</sup> However, any model needs to incorporate the key regulatory features  
84 of a pathway to accurately predict cell response. With structural information that clar-  
85 ified the mechanism of cytokine binding, for example, a model of IL-4, IL-7, and IL-21  
86 binding revealed pathway cross-talk due to the relative  $\gamma_C$  receptor affinities.<sup>27</sup> Nev-

87 ertheless, these models have not accounted for endosomal trafficking nor been con-  
88 structed to model multiple immune cell types. IL-2 induces rapid endocytosis-mediated  
89 IL-2R $\alpha$  and IL-2R $\beta$  downregulation,<sup>14,28</sup> and trafficking is known to be a potent regula-  
90 tory mechanism for all members of the  $\gamma_c$  family.<sup>29</sup> Indeed, recent IL-15 engineering  
91 observed that attenuated cytokine potency can lead to *greater* therapeutic effect via  
92 reduced receptor-mediated clearance.<sup>18</sup> Non-intuitive properties such as this can be  
93 better understood and optimized through models incorporating trafficking.

94 In this paper, we assemble a predictive model and tools to visualize  $\gamma_c$  cytokine fam-  
95 ily regulation. We first built a family-wide mathematical model that incorporates both  
96 binding and trafficking kinetics. This more comprehensive model allows us to investi-  
97 gate emergent behavior, such as competition between cytokines. This cytokine family  
98 is inherently high dimensional—with multiple ligands, cognate receptors, and cells with  
99 distinct expression. Therefore, we use tensor factorization to visualize the family-wide  
100 regulation. This map helps to identify how native or engineered ligands are targeted  
101 to specific immune cell populations based on their receptor expression levels. The  
102 methods used here can similarly be used in experimental and computational efforts  
103 of decoding other complex signaling pathways such as Wnt, Hedgehog, Notch, and  
104 BMP/TGF $\beta$ .<sup>30-33</sup>

## 105 **Results**

### 106 **Trafficking is necessary to capture IL-2 and IL-15 dose response and** 107 **the effect of IL-2R $\alpha$ expression**

108 To model how individual binding events give rise to cell response, we built a differential  
109 equation model representing the relevant binding and regulatory mechanisms within  
110 the  $\gamma_c$  receptor cytokine family (Fig. 1A). Binding interactions were modeled based on  
111 their known structural components, and led to the formation of receptor complexes  
112 capable of JAK/STAT signaling.<sup>1</sup> Endocytic trafficking of cell surface receptors is a crit-  
113 ical mechanism of regulatory feedback.<sup>34-37</sup> Therefore, we extended earlier modeling  
114 efforts by including the trafficking of receptors and their complexes.<sup>14,26</sup> We assumed  
115 that species trafficked into an endosomal compartment while continuing to produce

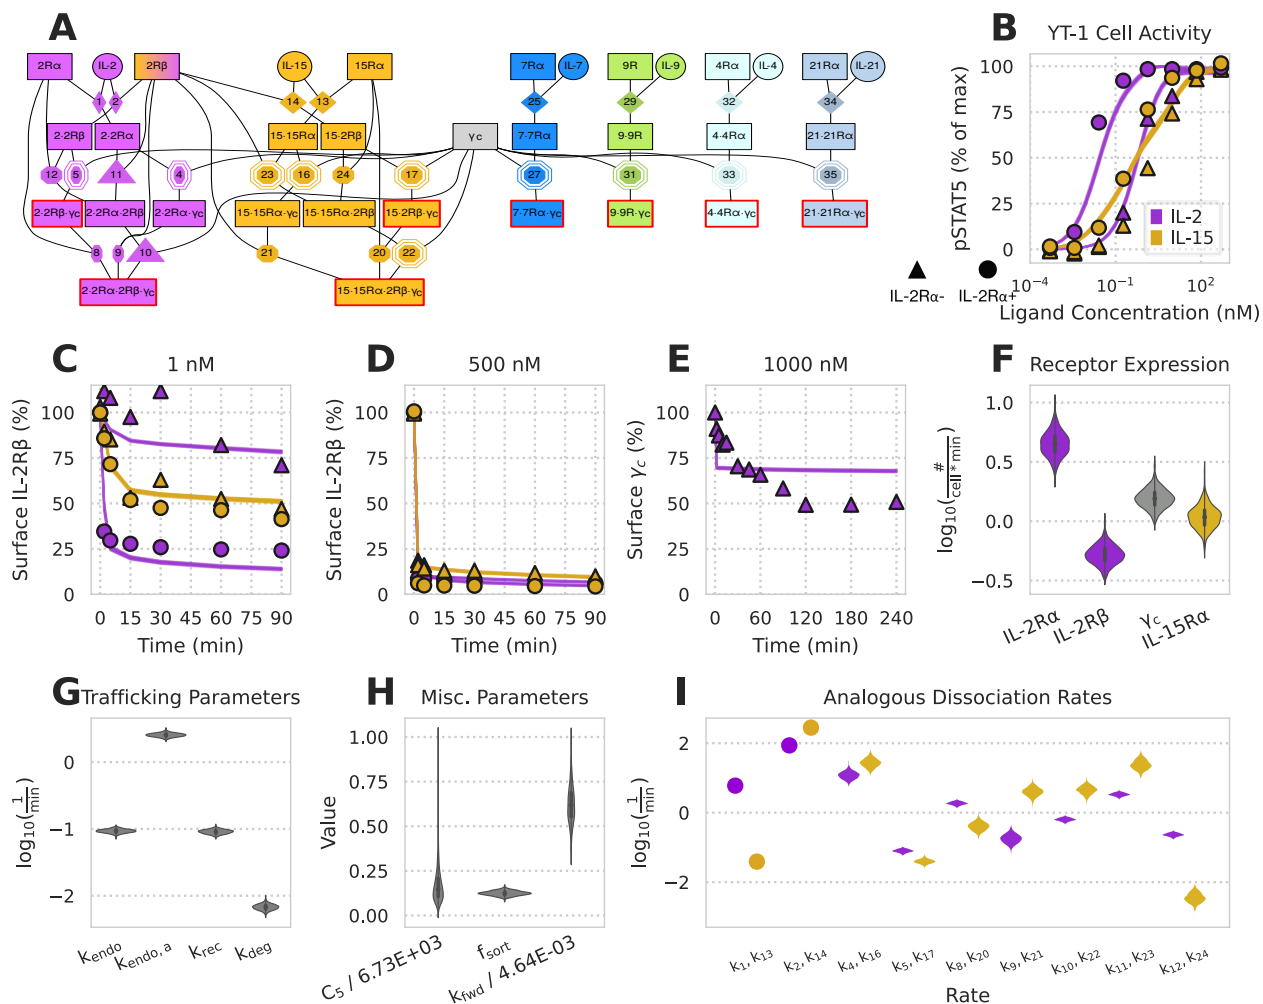

**Figure 1: Incorporating trafficking leads to an accurate model of IL-2 & IL-15 response.**

A) Schematic of all receptor (boxes)-ligand (circles) complexes and binding events. Active (pSTAT signaling; containing two non- $\alpha$  receptors) complexes are outlined in red. Rate constants obtained from literature, detailed balance, or fitting are denoted by diamonds, octagons, or octagons with a double outline, respectively. Rate constants that were experimentally measured relative to other rates are denoted by triangles. B) Model prediction vs. experimental results for maximal pSTAT5 activation in YT-1 cells under various concentrations of ligand stimulation for 500 min. C-E) Model prediction vs. experimental results for the percent of initial IL-2R $\beta$  (C, D) and  $\gamma_c$  (E) on the cell surface for various ligand stimulation concentrations and cell types. The 25-75% and 10-90% confidence intervals of model predictions are shaded dark and light respectively. Due to low prediction variability, only the 25-75% interval is visible. F-H) Posterior distributions after data fitting.  $C_5$  has units of  $\# \times \text{cell}^{-1}$ ,  $k_{\text{fwd}}$  has units of  $\text{cell} \times \#^{-1} \times \text{min}^{-1}$ , and  $f_{\text{sort}}$  is unitless. I) Posterior distributions for the analogous reaction rates of IL-2 and IL-15. Rates constants measured in literature are represented by dots.

116 JAK/STAT signaling and participate in binding events.

117 Rate parameters for IL-2 and IL-15 binding events were parameterized by previous ex-  
118 perimental measurements, detailed balance, or estimated by model fitting to existing  
119 experimental measurements (Fig. 1B-E). Fitting was performed to measurements of  
120 STAT5 phosphorylation and surface IL-2R $\beta$ / $\gamma_c$ , upon either IL-2 or IL-15 stimulation, in  
121 either wild-type YT-1 human NK cells or YT-1 cells selected for expression of IL-2R $\alpha$ . The  
122 posterior parameter distributions from these fits (Fig. 1F-I) were plugged back into our  
123 model and showed quantitative agreement with the data, including differential sensi-  
124 tivity with IL-2R $\alpha$  expression (Fig. 1B-F).<sup>14,38</sup> To evaluate the effect of including traf-  
125 ficking, we fit a version of the model without trafficking to the pSTAT5 measurements,  
126 using the same cell population as before; the model failed to fully capture differences  
127 with IL-2R $\alpha$  expression even when using this limited fitting data (Fig. S1). Within the  
128 posterior distribution of parameter fits, IL-2·IL-2R $\alpha$  complexes had a higher affinity for  
129 IL-2R $\beta$  and  $\gamma_c$  than their IL-15·IL-15R $\alpha$  counterparts in the trafficking model ( $k_4 < k_{16}$   
130 &  $k_{11} < k_{23}$ ), consistent with prior work (Fig. 1I).<sup>39</sup> However, the opposite was inferred  
131 for IL-2R $\beta$  ( $k_4 > k_{16}$ ) and the affinities were equal for  $\gamma_c$  ( $k_{11} = k_{23}$ ) in the no-trafficking  
132 model (Fig. S1B). Depletion of surface IL-2R $\beta$  and  $\gamma_c$  occurs through rapid endocytosis  
133 of active complexes and indeed, depletion occurred faster at higher cytokine doses  
134 (Fig. 1C-E). Correspondingly, active complex internalization ( $k_{\text{endo},a}$ ) was inferred to be  
135  $\sim 10x$  greater than that for inactive species ( $k_{\text{endo}}$ ) (Fig. 1G). These data indicated that  
136 accounting for trafficking is essential for modeling IL-2 and IL-15 signaling response.

137 Since IL-2 and IL-15 drive the formation of analogous active complexes, with IL-2R $\beta$ ,  
138  $\gamma_c$ , and a signaling-deficient high-affinity receptor (IL-2R $\alpha$ /IL-15R $\alpha$ ), comparing their  
139 inferred binding rates gave insight into how IL-2 and IL-15 differ from one another  
140 (Fig. 1I). The two ligands had nearly the same direct binding affinity to IL-2R $\beta$ ; however,  
141 IL-15 had a higher affinity than IL-2 for its  $\alpha$ -chain. Consequently, IL-15's complexes  
142 were inferred to more readily dimerize with a free  $\alpha$ -chain than IL-2's complexes ( $k_8 >$   
143  $k_{20}$ ,  $k_{12} > k_{24}$ ). Similarly, IL-15 complexes had a slightly higher affinity for capturing IL-  
144 2R $\beta$ / $\gamma_c$  than their IL-2 counterparts ( $k_9 < k_{21}$ ,  $k_{10} < k_{22}$ ,  $k_{11} < k_{23}$ ). The affinities of  $\gamma_c$   
145 binding to ligand·IL-2R $\beta$  and ligand· $\alpha$ -chain complexes were comparable between IL-2  
146 and IL-15 ( $k_4 = k_{16}$ ,  $k_5 = k_{17}$ ). The data is also consistent with the literature in that both

147 ligands have a higher affinity for IL-2R $\beta$  when they are bound to their  $\alpha$ -chain ( $k_2$ ,  $k_{14}$   
148  $> k_{11}$ ,  $k_{23}$ ).<sup>39</sup> In total, a model of IL-2 and IL-15 incorporating trafficking is consistent  
149 with known biophysical and cell response measurements.

## 150 **Family model correctly captures IL-4/IL-7 dose responses and cross-** 151 **inhibition**

152 To further test our model incorporating trafficking, we evaluated its performance in a  
153 series of experiments involving IL-4 and IL-7. IL-2 and IL-15 involve the same signaling-  
154 competent receptors and so the signaling activity of each cytokine cannot be dis-  
155 tinguished. IL-4 and IL-7 activity, in contrast, can be distinguished when both cy-  
156 tokines are co-administered to cells by measuring STAT6 and STAT5 phosphorylation,  
157 respectively.<sup>2</sup> Using this phenomenon we explored cross-inhibition data wherein IL-4  
158 and IL-7 doses were administered to human PBMC-derived T cells (CD4<sup>+</sup>TCR<sup>+</sup>CCR7<sup>high</sup>)  
159 both individually and together.<sup>27</sup>

160 Using surface abundance measurements of IL-4R $\alpha$ , IL-7R $\alpha$ , and  $\gamma_c$ , we applied a steady-  
161 state assumption in the absence of ligand to solve for each receptor expression rate.<sup>27</sup>  
162 Our model fits both single and dual cytokine dose-response data sets with high accu-  
163 racy (Fig. 2B–C). The fitting process identifiably constrained reaction rates, trafficking  
164 parameters, and pSTAT scaling constants (Fig. 2F–I). While surface abundance was  
165 constrained, the receptor expression rates still formed distributions dependent on traf-  
166 ficking parameters (Fig. 2G–I).

167 The experimental data and model fits showed that IL-7 inhibited IL-4 activity more than  
168 vice versa (Fig. 2C).<sup>27</sup> Consistent with the experimentally-derived mechanism,<sup>27</sup> this  
169 inhibitory behavior was explained by the competition of ligand· $\alpha$ -chain complexes for  
170 the common  $\gamma_c$ . The inferred  $K_d$  of this dimerization process for IL-7 ( $k_{27}$ ) was smaller  
171 than the  $K_d$  for IL-4 ( $k_{33}$ ), indicating that there was tighter dimerization of IL-7·IL-7R $\alpha$   
172 to  $\gamma_c$  than there was dimerization of IL-4·IL-4R $\alpha$  to  $\gamma_c$  (Fig. 2F). The competition for  $\gamma_c$   
173 was determined to play a larger role in signaling inhibition than receptor internaliza-  
174 tion since our model predicted that the same inhibitory relationships hold when active  
175 complexes internalize at the same rate as other species (Fig. 2D). Internalization was  
176 additionally dismissed because the majority of  $\gamma_c$  remained on the cell surface after lig-



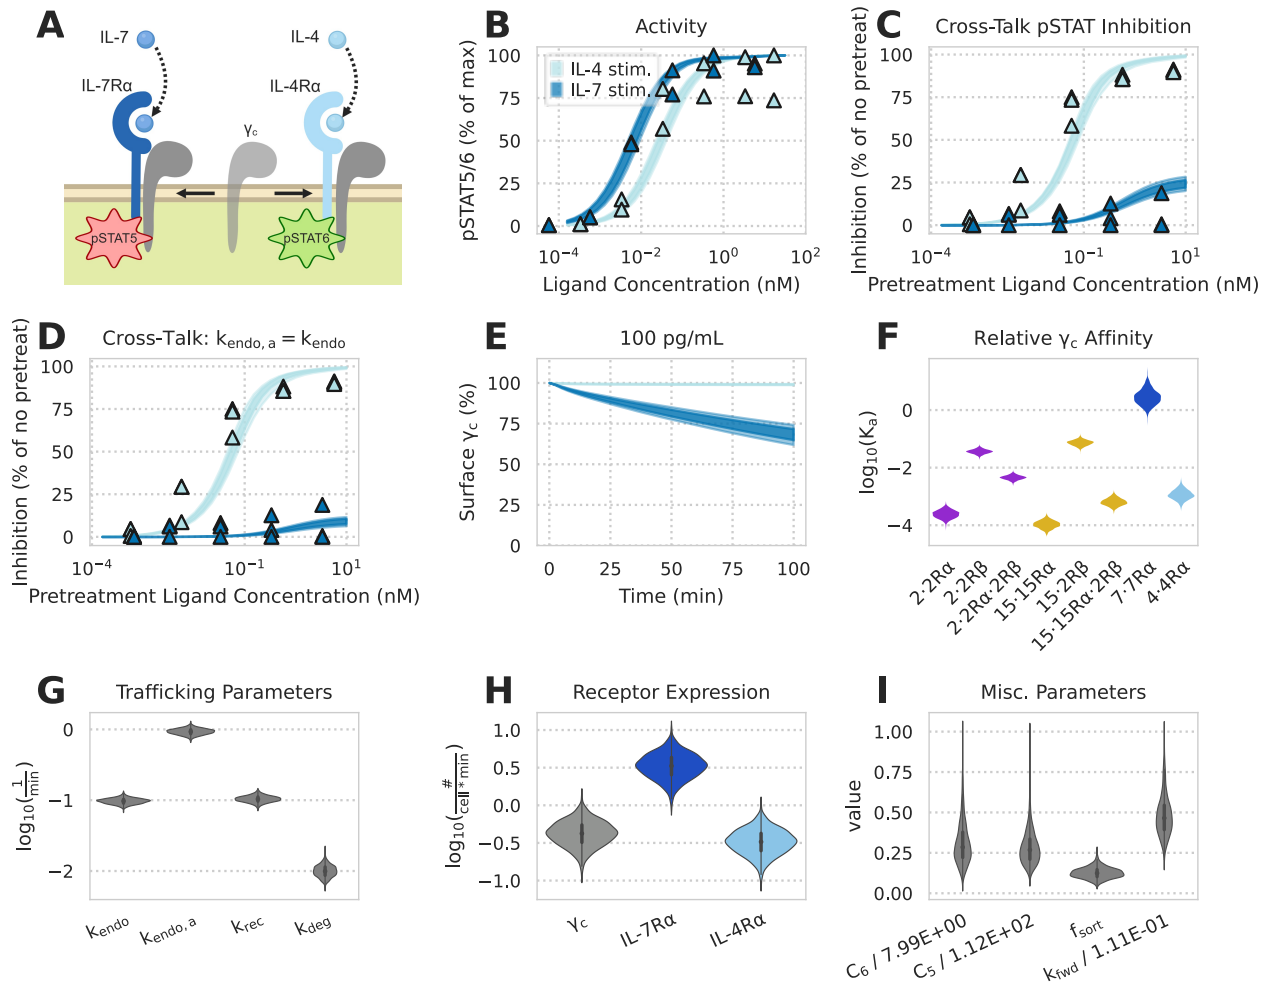

**Figure 2: A reaction model captures cytokine-cytokine interactions.** A) Schematic of IL-4 and IL-7 receptor complexes competing for  $\gamma_c$  and generating distinct pSTAT signals. B-C) Fitting model to experimental data. Experimental measurements are denoted by triangles. Shaded areas represent the 25-75% and 10-90% confidence intervals of model predictions. pSTAT5 and pSTAT6 were measured for IL-7 and IL-4 experiments, respectively. B) Single-cytokine pSTAT dose-response measurements for 10 min of exposure to IL-4 and IL-7. C) Percent inhibition of the second cytokine's pSTAT response in a dual-cytokine dose-response experiment. Human PBMC-derived T cells ( $CD4^+TCR^+CCR7^{\text{high}}$ ) were pretreated with various concentrations of one cytokine for 10 min before being stimulated with a fixed concentration (50 pg/mL IL-7 or 100 pg/mL IL-4) of the other cytokine for an additional 10 min. D) Model predictions for percent inhibition of the second cytokine's pSTAT response in a dual-cytokine dose-response experiment with the assumption that active species are endocytosed at the same rate as inactive species ( $k_{\text{endo},a} = k_{\text{endo}}$ ). E) Model predictions for percent of  $\gamma_c$  on the cell surface when exposed to 100 pg/mL of either IL-7 or IL-4 for 100 min. F) Violin plot of  $K_a$  values obtained via posterior distributions of  $k_{\text{fwd}} / k_{\text{rev}}$  for  $k_{\text{rev}}$  parameters corresponding to different complexes competing for the common  $\gamma_c$  (Fig. 1A). G-I) Posterior distributions from fitting to data. Scaling constants  $C_5$  and  $C_6$  have units of  $\# \times \text{cell}^{-1}$ ,  $k_{\text{fwd}}$  has units of  $\text{cell} \times \#^{-1} \times \text{min}^{-1}$ , and  $f_{\text{sort}}$  is unitless



177 and stimulation in both model simulation and experimental measurement (Fig. 2E).<sup>27</sup>

## 178 **Tensor Factorization Maps the Gamma Chain Family Response Space**

179 Even with an accurate model, exploring how dynamic responses vary across respond-  
180 ing cell types and ligand treatments remains challenging. Restricting ones' view to a  
181 single time point, cell type, or ligand concentration provides only a slice of the picture.  
182 Therefore, we sought to apply factorization as a means to globally visualize ligand  
183 response.

184 As response to ligand is mostly defined by receptor expression, we quantitatively pro-  
185 filed the abundance of each IL-2, IL-15, and IL-7 receptor across ten PBMC subpop-  
186 ulations (Fig. 3A). PBMCs were stained using receptor-specific fluorescent antibodies  
187 and analyzed by flow cytometry; their subpopulations were separated using canon-  
188 ical markers (Fig. S3, tbl. S1). These data recapitulated known variation in these  
189 receptors, including high IL-7R $\alpha$  or IL-2R $\alpha$  expression in helper and regulatory T cells,  
190 respectively.<sup>1,40</sup> As mentioned above, IL-7 is uniquely able to cross-inhibit other  $\gamma_c$   
191 cytokines, and excess IL-7R $\alpha$  likely helps to ensure this occurs (Fig. 2C).<sup>27</sup> Principal  
192 component analysis (PCA) helped visualize variation in this receptor abundance data  
193 (Fig. 3B-C). Principal component 1 most prominently separated the NK cells from all  
194 others due to their distinct receptor expression, with high levels of IL-2R $\beta$  and rela-  
195 tively lower levels of  $\gamma_c$ . Principal component 2 then separated effector and regulatory  
196 T cell populations, based on their high IL-7R $\alpha$  or IL-2R $\alpha$  abundance, respectively. How-  
197 ever, PCA also helped to identify slightly higher  $\gamma_c$  levels in T<sub>reg</sub>s, and the slightly more  
198 T<sub>reg</sub>-like profile of memory CD8+ cells.

199 To build a tensor of model predictions, we assembled simulation predictions across  
200 cell types, ligand conditions, and time. This three-dimensional (time, cell type, ligand)  
201 tensor was then decomposed with non-negative canonical polyadic (CP) decomposi-  
202 tion (Fig. 3D). We selected three components during decomposition as this number  
203 captured 95% of the variance in our original data tensor (Fig. 3E). To show the relation-  
204 ships among the tensor's three dimensions, the component plots of each dimension  
205 were plotted alongside each other.

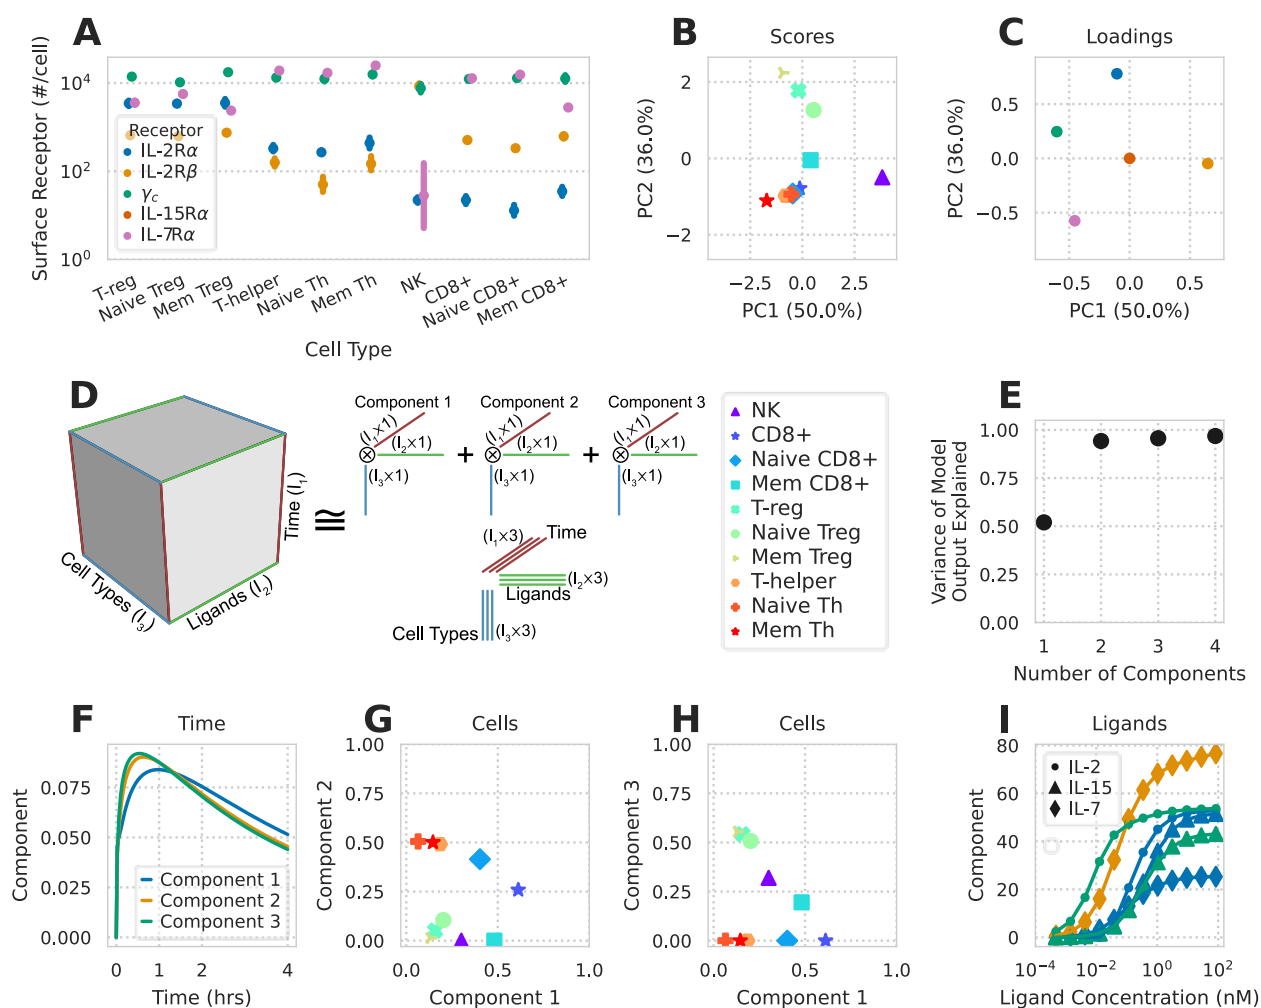

Figure 3: **Tensor factorization to map model-predicted cytokine responses.** A) Measured receptor abundance for ten PBMC-derived subpopulations. Points and error bars show geometric mean and standard deviation respectively (N = 4). Error bars for some points are too small to display. B-C) PCA scores (B) and loadings (C) of receptor abundance. Axis label percentages indicate percent variance explained. D) Schematic representation of CP decomposition. Model predictions are arranged in a cube depending upon the time, ligand treatment, and cell type being modeled. CP decomposition then helps to visualize this space. E) Percent variance reconstructed (R<sup>2</sup>X) versus the number of components used in non-negative CP decomposition. F-I) Component values versus time (F), cell type (G-H), or ligand stimulation (I). The variation explained by each component is the product of the component's time, ligand, and cell type factorization. Ligand components with only negligible values (< 5% max) are not shown.

206 CP decomposition can be interpreted by matching a single component's effects across  
207 factor plots for each dimension. For example, component 2 is greatest at roughly 50  
208 mins, for helper and CD8+ T cells, and almost exclusively with IL-7 stimulation (Fig. 3F-  
209 I). This indicates that this variation in the data occurs with IL-7 stimulation, leads to  
210 a response in helper and CD8+ T cells, and peaks at 50 mins. In this way, different  
211 contributory factors in cell response are separated.

212 All components showed similar variation with time, peaking quickly and then decreas-  
213 ing after roughly 50 mins (Fig. 3F). This can be understood through two phases, in which  
214 receptor activation occurs, and then trafficking-mediated downregulation of the recep-  
215 tors (Fig. 1). Comparing the cells and ligands decomposition plots showed expected  
216 effects. IL-7 response was separated as component 2, showed a dose-dependent in-  
217 crease, and correlated with IL-7R $\alpha$  expression levels (Fig. 3A/G/I). Interestingly, IL-2/-15  
218 response separated by concentration, rather than ligand. Low concentrations of IL-2  
219 were represented by component 3, and preferentially activated regulatory over effec-  
220 tor T cells (Fig. 3H/I). High concentrations of IL-2/-15 were represented by component 1  
221 and similarly activated effector and regulatory T cells (Fig. 3G/I). This known dichotomy  
222 occurs through higher IL-2R $\alpha$  expression in T<sub>reg</sub>S (Fig. 3A). Importantly, while PCA can  
223 help to distinguish cells based on distinct receptor expression profiles, cells separated  
224 differently based on their predicted ligand stimulation response (Fig. 3B/G/H). This  
225 demonstrates the unique benefit of tensor- and model-based factorization to distin-  
226 guish cells based upon their predicted response profiles.

227 Other tensor decomposition methods exist and can also be applied to visualize model-  
228 predicted response. For example, non-negative Tucker decomposition relaxes CP de-  
229 composition by employing a core tensor enabling interaction terms between compo-  
230 nents (Fig. S4).<sup>41</sup> However, this flexibility comes at the cost of interpretability, as visu-  
231 alizing the core tensor's effect is challenging. In total, factorization methods provide  
232 an effective means of visualizing the high-dimensional regulation of complex receptor  
233 families, including the influence of time, ligand stimulation, and receptor expression.

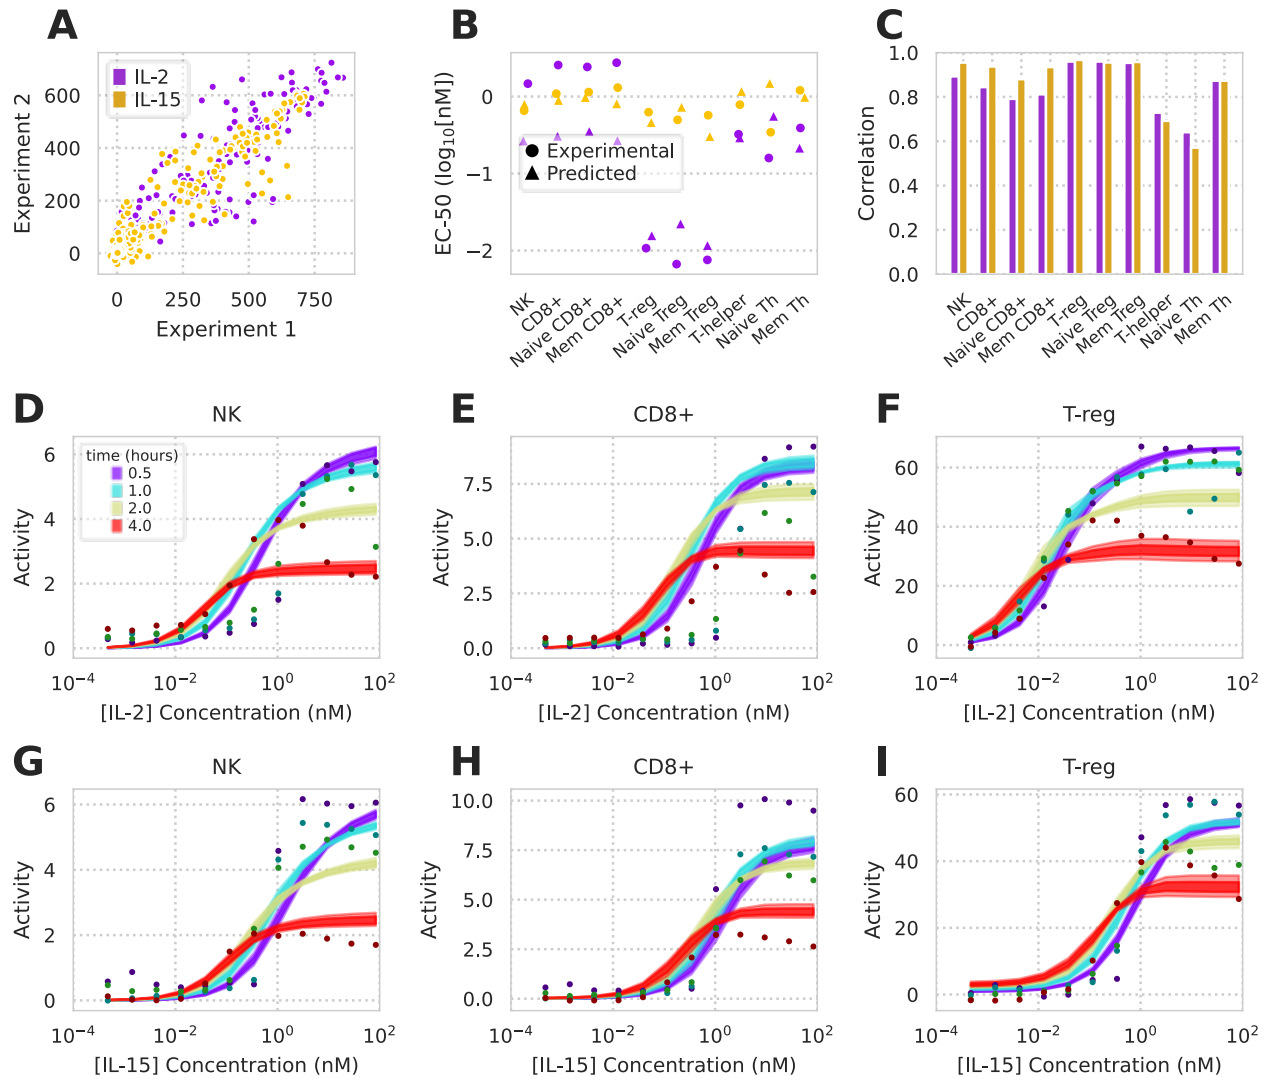

**Figure 4: Model accurately predicts cell type-specific response across a panel of PBMC-derived cell types.** A) Comparison of two replicates measuring pSTAT5 response to a dose-response of IL-2/-15, time course, and panel of PBMC-derived cell types. B) Both experimentally-derived and model-predicted EC<sub>50</sub>s of dose response across IL-2/-15 and all 10 cell types. EC<sub>50</sub>s are shown for 1 hr time point. C) Pearson correlation coefficients between model prediction and experimental measurements for all 10 cell populations (full data shown in Fig. S5). D-I) pSTAT5 response to IL-2 (D-F) or IL-15 (G-I) dose responses in NK, CD8+, and T<sub>reg</sub> cells.

## 234 **Accurately Predicted Response Across a Panel of PBMC-Derived Cell** 235 **Types**

236 We evaluated whether our model accurately predicts differences in the cell type-  
237 specificity of ligand treatment by comparing its predictions for IL-2/-15 responses  
238 across a panel of 10 PBMC-derived cell populations. We both measured and used our  
239 model to predict PBMC response to cytokine stimulation at 12 concentrations (0.5  
240 pM–84 nM) and 4 time points (30 minutes, 1, 2, and 4 hours). Individual cell types  
241 displayed reproducible responses to IL-2/-15 treatment (Fig. 4A). Overall, our model  
242 predictions of ligand pSTAT5 response closely matched experimental measurement  
243 (Figs. 4, S5). The differences between cell types largely matched known differences  
244 in cytokine response. For example, T<sub>reg</sub>s were markedly sensitive to IL-2 (Fig. 4B/F),  
245 but not IL-15 (Fig. 4B/I), at low concentrations of the cytokine.<sup>23,24</sup> Small amounts of  
246 of IL-2R $\alpha$  in helper T cells (Fig. 3A) partially sensitizes them to IL-2 (Fig. 4B; Fig. S5H).  
247 Our model accurately captured these differences in sensitivity and response across  
248 all the cell populations (Fig. 4C).

249 While the model accurately predicted experimentally-measured responses overall, and  
250 specifically the sensitivities of the dose-response profiles, we noticed some discrep-  
251 ancy specifically at high ligand concentrations and longer times in specific cell popula-  
252 tions (Fig. 4; Fig. S5). For example, while CD8+ cells almost exactly match model pre-  
253 dictions at 1 hr, by 4 hrs we experimentally observed a biphasic response with respect  
254 to IL-2 concentration, and a plateau with IL-15 that decreased over time. This decrease  
255 in signaling was most pronounced with the CD8+ cells, but could be observed to lesser  
256 extents in some other cell populations such as NK cells (Fig. S5). We hypothesize two  
257 possible explanations for this discrepancy: First, CD8+ populations are known to pro-  
258 teolytically shed IL-2R $\alpha$  in an activity-responsive manner.<sup>42</sup> Second, our model only  
259 uses a very simple sigmoidal relationship between active receptor and pSTAT5 signal.  
260 Other components of the JAK-STAT pathway surely influence its dynamic response.<sup>43</sup>  
261 However, overall the model presented here remains useful for exploring the determi-  
262 nants of cell type-specific response, which originate at the receptor expression profile  
263 on the cell surface.

264 **Tensor Factorization of Experimental Measurements Distinguishes**  
 265 **Cell Type-Specific Responses**

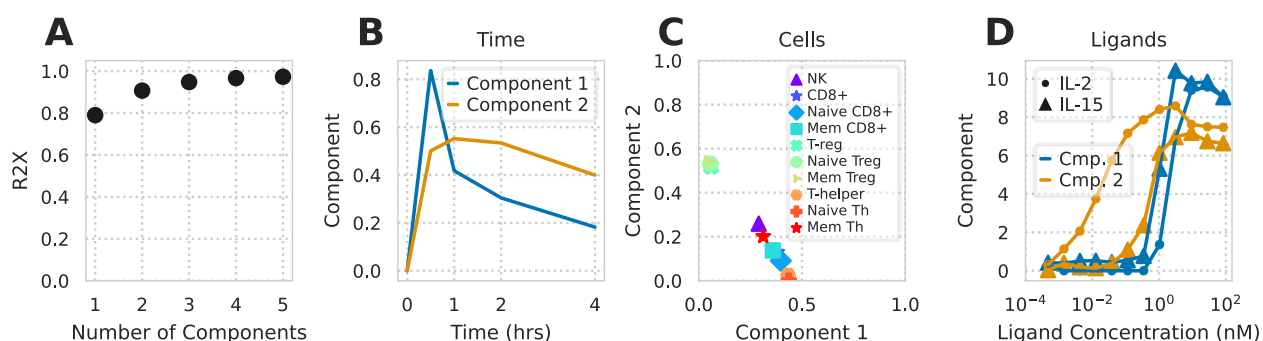

Figure 5: **Non-negative CP decomposition applied to experimental pSTAT5 measurements.** A) R2X of non-negative CP decomposition versus number of components used. B-D) Decomposition plot with respect to time (B), cell type (C), or ligand treatment (D).

266 Given that tensor factorization helped to visualize model predictions of IL-2, -7, and  
 267 -15 response, we wished to evaluate whether it could similarly help to visualize exper-  
 268 imental measurements. We structured our experimental pSTAT5 measurements in an  
 269 identical format to the model simulation tensor Fig. 3. Factoring into two components  
 270 explained roughly 90% of the variance in the original data (Fig. 5A), which we can then  
 271 interpret using each of the factor plots (Fig. 5B-D).

272 Interestingly, these factors are distinguished by their concentration dependence more  
 273 so than being tied to a specific ligand (Fig. 5D). Component 2 increases with low con-  
 274 centrations of IL-2, while component 1 only increases at high concentrations of ei-  
 275 ther ligand. As expected, effector and regulatory T cells are most strongly associated  
 276 with components 1 and 2, respectively, matching their known dose-response profiles  
 277 (Fig. 4). However, component 2 is also distinct from 1 in its sustained activation (Fig. 5B;  
 278 Fig. S5). This can be expected from rapid endocytosis-mediated downregulation of  
 279 IL-2R $\beta$  at high IL-2/-15 concentrations (Fig. 1). Thus, tensor factorization helps to sep-  
 280 arate these differences in dose- and cell type-specific responses. Furthermore, there  
 281 was clear correspondence between the model and experimental factorization. For ex-  
 282 ample, the low-dose IL-2-specific component in the model and experiment factoriza-  
 283 tion correlated strongly in their cell type weighting (cosine similarity of 0.96; Fig. 3H;  
 284 Fig. 5C).

## 285 **Model Accurately Captures Cell Type-Specific Response to IL-2 Muteins**

286 Using the model, we sought to identify strategies for selectively targeting  $T_{reg}$ s. In or-  
287 der to quantify the effectiveness of selectively activating  $T_{reg}$ s, we defined a specificity  
288 metric as the normalized pSTAT5 response of  $T_{reg}$ s divided by the pSTAT5 response of T-  
289 helper or NK cells. As expected, both model prediction and experimental values of this  
290 specificity increased with lower concentrations of IL-2 and had a lesser concentration-  
291 dependent relationship with IL-15 (Fig. 6A/B). With this quantity, we then examined  
292 the sensitivity of the specificity metric with respect to both surface and endosomal  
293 binding. Decreasing IL-2R $\alpha$  unbinding ( $k_{5rev}$ ), particularly in the endosome, provided  
294 the largest and most consistent benefit to specificity (Fig. 6C). Changes in endosomal  
295 binding rates have been shown to have important effects on protein therapy's half-life  
296 and potency.<sup>44</sup> To the extent this binding can be separately manipulated, the model  
297 indicates it might help to improve specificity as well. Moreover, the model predicts  
298 that ligands with reduced IL-2R $\alpha$  affinity had a decreased ability to specifically acti-  
299 vate  $T_{reg}$ s with respect to NK and T-Helper cells regardless of their IL-2R $\beta/\gamma_c$  affinity  
300 (Fig. 6D). Therefore, while reducing IL-2R $\beta/\gamma_c$  affinity can help modulate the potency of  
301 these cytokines, maintaining IL-2R $\alpha$  affinity may be especially critical. In total, these  
302 results demonstrate this model's ability to predict immune cell response to wild-type  
303 or engineered cytokines, particularly for engineering cell-specific responses.

304 To evaluate the potential of the model for cytokine engineering, we measured PBMC  
305 response to several Fc-bound IL-2 monomers. Several wild-type and mutant forms  
306 of IL-2 were produced as fusions with a monomeric human antibody Fc domain. Tar-  
307 getted mutations were introduced to IL-2 domains known to be instrumental to either  
308 IL-2R $\alpha$  or IL-2R $\beta/\gamma_c$  binding. Cytokines are often Fc-conjugated to increase the drug's  
309 *in vivo* half-life, and can be conjugated in a variety of orientations. We quantified  
310 the effect of our engineered mutations and Fc conjugation on IL-2R $\alpha$  and IL-2R $\beta/\gamma_c$   
311 binding kinetics using bio-layer interferometry (Fig. S6). Surprisingly, we found that Fc-  
312 conjugation to the N-terminus selectively lowered IL-2R $\beta/\gamma_c$  affinity, while conjugation  
313 to the C-terminus selectively lowered IL-2R $\alpha$  affinity (tbl. SD1, Fig. 6E). Therefore, Fc  
314 conjugation can have either complementary or counterproductive effects on mutation-  
315 mediated changes in receptor affinity, and affinity must be assessed in the clinical



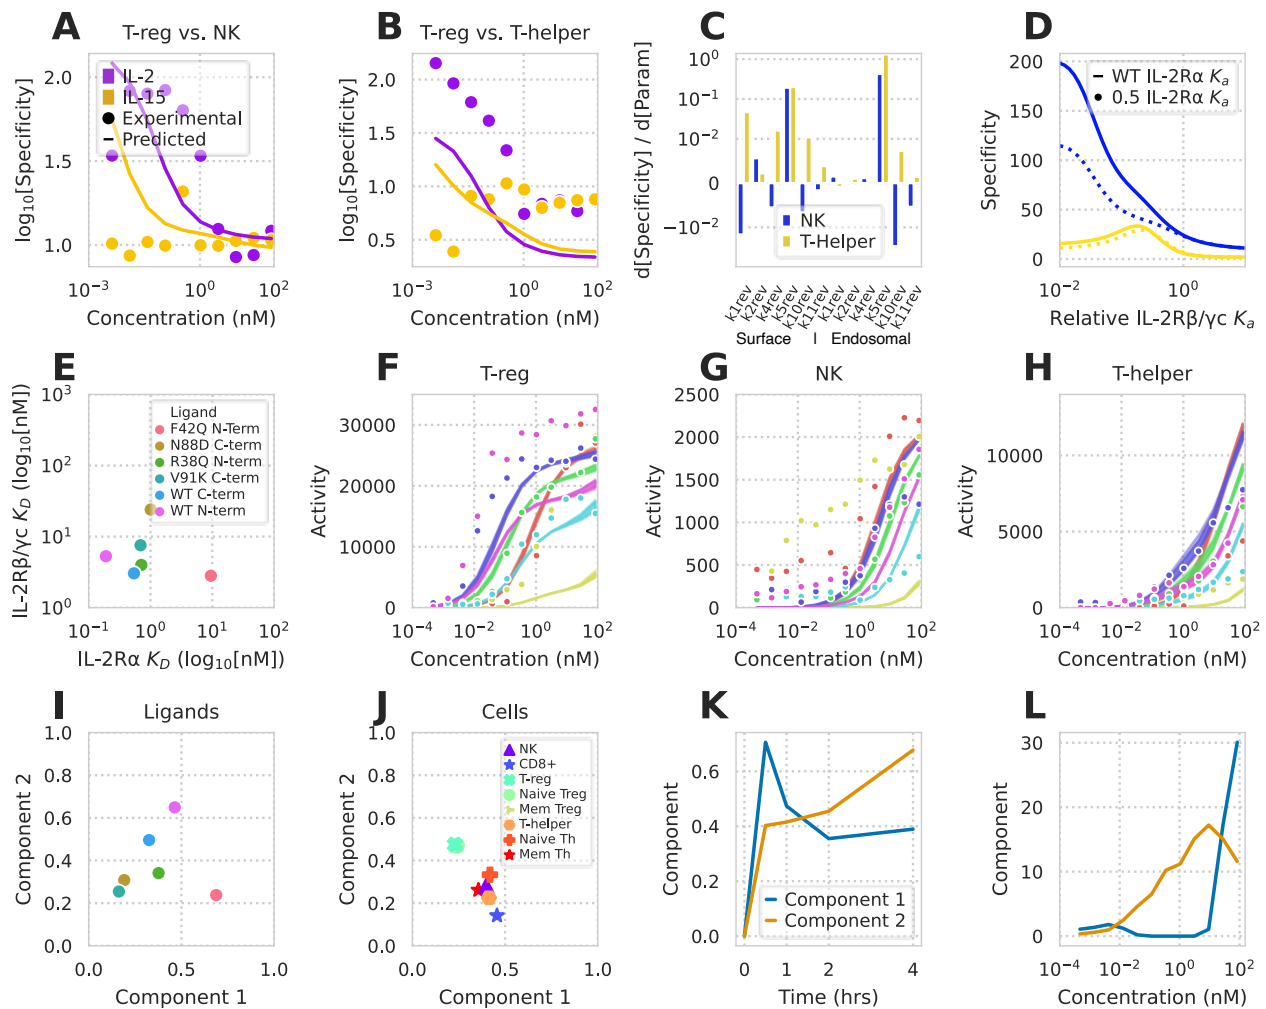

**Figure 6: Model and tensor factorization predicts and decodes cell type-specific responses to IL-2 muteins.** A-B) Predicted and measured T<sub>reg</sub> activation specificity compared to NK (A) and T helper (B) cells. C) Partial derivatives of T<sub>reg</sub> activation specificity compared to NK and T helper cells with respect to each surface and endosomal reverse binding rate constant. D) T<sub>reg</sub> activation specificity with respect to NK and T helper cells as a function of IL-2R $\beta/\gamma$  binding affinity for ligands with wild type and reduced IL-2R $\alpha$  affinity. Specificity values are shown for cells exposed to a cytokine concentration of 38 pM. E) IL-2R $\alpha$  and IL-2R $\beta/\gamma$  dissociation constants for our panel of IL-2 muteins. F-H) Predicted versus experimental immune cell responses to IL-2 muteins for T<sub>reg</sub>s (F), NK cells (G), and T-helpers (H). Dots represent experimental measurements and shaded regions represent 10-90% confidence interval for model predictions. Mutein stimulant denoted by color. I-L) Tensor factorization of experimentally measured cellular activation values for IL-2 muteins. Component values versus ligand (I), cell type (J), time (K), and cytokine concentration (L).

316 format.

317 Using these altered affinities, we were able to accurately predict cell type-specific ac-  
318 tivity response to our modified ligands (Fig. S7, Fig. 6F-H). Ligands with decreased  
319 IL-2R $\alpha$  or IL-2R $\beta$ / $\gamma_c$  affinity had decreased T<sub>reg</sub> or T-Helper activity response, respec-  
320 tively, as expected. As before, visualizing the effect of altered binding kinetics on cel-  
321 lular response is complicated by the contribution of cell type, concentration, and time  
322 (Fig. 3E-I). In order to visualize our results, we performed tensor factorization using  
323 the experimentally-determined pSTAT5 response of PBMCs exposed to both wild-type  
324 and modified IL-2 ligands (Fig. 6I-L). Two components explained 80% of the variance in  
325 the new combined data tensor. Among the ligands, wild-type N-terminally conjugated  
326 IL-2 was the most potent inducer of T<sub>reg</sub> response as shown by its strong component 2  
327 weighting (Fig. 6I/J). The difference in signaling with Fc conjugation orientation is likely  
328 due to these conjugation types' opposing effects on the cytokine's IL-2R $\alpha$  affinity.

## 329 Discussion

330 Here, we built a mass-action kinetic binding model for the common  $\gamma_c$  receptor fam-  
331 ily, and used factorization methods to explore its cell type-dependent behavior. This  
332 approach provided insights into its high-dimensional regulation. Our binding-reaction  
333 model combined the structure of ligand interaction with endosomal trafficking, both  
334 of which were critical for accurately modeling response (Fig. 1 & Fig. S1). After fitting  
335 our model to previously published cytokine response data, we were able to predict IL-2  
336 and -15 response across a wide panel of PBMC-derived cell types (Fig. 4). Mass-action  
337 models can help to explain counter-intuitive features of ligand response and identify  
338 specific strategies for optimizing therapeutically-desired properties.<sup>45,46</sup> In the case of  
339 the  $\gamma_c$  receptor cytokines, a therapeutic goal has been to specifically modulate subpop-  
340 ulations of cells based on their unique receptor expression profiles.<sup>12,22-24</sup> To visualize  
341 these possibilities, we employed tensor factorization to map the signaling response  
342 space. This map provided a clearer picture of differential responsiveness between lig-  
343 and s, with selective and increased activation for certain cells and ligands (Fig. 5 &  
344 fig. 6). For example, we could clearly identify the selectivity of T helper cells for IL-7,  
345 and low concentrations of IL-2 for T<sub>reg</sub>S (Fig. 3).

346 The model described here serves as an effective tool for cell type-selective rational  
347 cytokine design. In addition to the natural ligands, many cytokine muteins have been  
348 designed with altered binding affinities to specific receptors.<sup>20,21</sup> Our model serves as  
349 a computational tool for comparing these muteins as immunotherapeutic drugs that  
350 selectively activate certain cell populations. For example, our model helped to identify  
351 that high IL-2R $\alpha$  affinity is essential to preserve T<sub>reg</sub> specificity, regardless of the affinity  
352 toward IL-2R $\beta/\gamma_c$  (Fig. 6). Fc conjugation orientation can significantly influence recep-  
353 tor affinity (including reducing IL-2R $\alpha$  affinity), and so this step of drug design needs  
354 to be incorporated into ligand optimization (Fig. 6E). Incorporating trafficking with the  
355 binding events of the cytokines allowed us to distinguish surface and endosomal bind-  
356 ing, which is an unexplored axis for further engineering cell-specific responses. Indeed,  
357 endosomal IL-2R $\alpha$  affinity is predicted to be *more* critical to T<sub>reg</sub> specificity than bind-  
358 ing on the surface, which agrees with the distinct temporal profiles of ligand response  
359 between cell types on the time-scale of trafficking (Fig. 6C & K).

360 Models incorporating the full panel of responding cell populations will enable further  
361 refinement of these engineered ligands.<sup>47</sup> Both IL-2 and IL-15 have extremely short  
362 half-lives *in vivo*, in part due to endocytosis mediated clearance.<sup>17,18</sup> Including endo-  
363 cytic trafficking of ligand will enable future work modeling ligand clearance *in vitro*  
364 and *in vivo*. Changes in receptor binding may therefore be selected based on both op-  
365 timized selectivity and pharmacokinetic properties. While cell types were defined here  
366 by their average receptor expression, cell-to-cell variability within these populations  
367 leads to variation in stimuli response.<sup>15</sup> Incorporating single cell variation will provide  
368 a more complete picture of population response, and may help to further refine cell  
369 type selectivity.

370 Receptor families with many receptors and ligands are often made up of a dense  
371 web of connections, making the role of individual components non-intuitive.<sup>30,33</sup> In-  
372 terconnected, cross-reactive components may have evolved as a tradeoff between  
373 transmitting ligand-mediated information and expanding the repertoire of cell-surface  
374 proteins.<sup>48</sup> The methods detailed in this paper can be applied to many signaling sys-  
375 tems characterized by pleiotropy and high-dimensionality. The combination of dynam-  
376 ical, mechanistic models and statistical exploration methods is particularly powerful to

377 provide actionable directions for how to optimize therapeutic response. Detailed bio-  
378 physical and structural characterization, animal disease models, and evidence from  
379 human genetic studies make this engineering possible for therapeutically targeting  
380 other other complex signaling pathways including FcγR, Wnt, Hedgehog, Notch, and  
381 BMP/TGFβ.<sup>30-33,49</sup>

## 382 **Methods**

383 All analysis was implemented in Python, and can be found at <https://github.com/meyer-lab/gc-cytokines>, release 1.0.  
384

## 385 **Model**

### 386 **Base model**

387 Cytokine (IL-2, -4, -7, -9, -15, & -21) binding to receptors was modeled using ordinary  
388 differential equations (ODEs). IL-2 and -15 each had two private receptors, one being a  
389 signaling-deficient  $\alpha$ -chain (IL-2R $\alpha$  & -15R $\alpha$ ) and the other being signaling-competent  
390 IL-2R $\beta$ . The other four cytokines each had one signaling-competent private receptor  
391 (IL-7R $\alpha$ , -9R, -4R $\alpha$ , & -21R $\alpha$ ). JAK-STAT signaling is initiated when JAK-binding motifs  
392 are brought together. JAK binding sites are found on the intracellular regions of the  
393  $\gamma_c$ , IL-2R $\beta$ , IL-4R $\alpha$ , IL-7R $\alpha$ , IL-9R, and IL-21R $\alpha$  receptors; therefore all complexes which  
394 contained two signaling-competent receptors were deemed to be active species. Lig-  
395 ands were assumed to first bind a private receptor and then can dimerize with other  
396 private receptors or  $\gamma_c$  thereafter. Direct binding of ligand to  $\gamma_c$  was not included due  
397 to its very weak or absent binding.<sup>50</sup>

398 In addition to binding interactions, our model incorporated receptor-ligand trafficking.  
399 Receptor synthesis was assumed to occur at a constant rate. The endocytosis rate  
400 was defined separately for active ( $k_{\text{endo},a}$ ) and inactive ( $k_{\text{endo}}$ ) receptors.  $f_{\text{sort}}$  fraction  
401 of species in the endosome were ultimately trafficked to the lysosome, and active  
402 species in the endosome had a sorting fraction of 1.0. All endosomal species not sent  
403 to lysosomes were recycled back to the cell surface. The lysosomal degradation and  
404 recycling rate constants were defined as  $k_{\text{deg}}$  and  $k_{\text{rec}}$ , respectively. We assumed no

405 autocrine ligand was produced by the cells. We assumed an endosomal volume of 10  
406 fL and endosomal surface area half that of the plasma membrane.<sup>46</sup> All binding events  
407 were assumed to occur with 5-fold greater disassociation rate in the endosome due to  
408 its acidic pH.<sup>34</sup>

409 Free receptors and complexes were measured in units of number per cell and soluble  
410 ligands were measured in units of concentration (nM). Due to these unit choices for our  
411 species, the rate constants for ligand binding to a free receptors had units of  $\text{nM}^{-1} \text{min}^{-1}$ ,  
412 rate constants for the forward dimerization of free receptor to complex had units of  $\text{cell}^{-1} \text{min}^{-1}$   
413  $\text{number}^{-1}$ . Dissociation rates had units of  $\text{min}^{-1}$ . All ligand-receptor binding pro-  
414 cesses had an assumed forward rate ( $k_{\text{bnd}}$ ) of  $10^7 \text{M}^{-1} \text{sec}^{-1}$ . All forward dimerization  
415 reaction rates were assumed to be identical, represented by  $k_{\text{fwd}}$ . Reverse reaction  
416 rates were unique. Experimentally-derived affinities of 1.0,<sup>27</sup> 59,<sup>51</sup> 0.1,<sup>52</sup> and 0.07  
417  $\text{nM}^{27}$  were used for IL-4, -7, -9, and -21 binding to their cognate private receptors, re-  
418 spectively. IL-2 and -15 were assumed to have affinities of 10 nM and 0.065 nM for  
419 their respective  $\alpha$ -chains,<sup>53-55</sup> and affinities of 144 nM and 438 nM for their respective  
420  $\beta$ -chains.<sup>53</sup> Rates  $k_5$ ,  $k_{10}$ , and  $k_{11}$  were set to their experimentally-determined disas-  
421 sociation constants of 1.5, 12, and 63 nM.<sup>53</sup>

422 Initial values were calculated by assuming steady-state in the absence of ligand. Dif-  
423 ferential equation solving was performed using the SUNDIALS solvers in C++, with a  
424 Python interface for all other code.<sup>56</sup> Model sensitivities were calculated using the ad-  
425 joint solution.<sup>57</sup> Calculating the adjoint requires the partial derivatives of the differen-  
426 tial equations both with respect to the species and unknown parameters. Constructing  
427 these can be tedious and error-prone. Therefore, we calculated these algorithmically  
428 using forward-pass autodifferentiation implemented in Adept-2.<sup>58</sup> A model and sensi-  
429 tivities tolerance of  $10^{-9}$  and  $10^{-3}$ , respectively, were used throughout. We used unit  
430 tests for conservation of mass, equilibrium, and detailed balance to help ensure model  
431 correctness.

## 432 **Model fitting**

433 We used Markov chain Monte Carlo to fit the unknown parameters in our model using  
434 previously published cytokine response data.<sup>14,27</sup> Experimental measurements include

435 pSTAT activity under stimulation with varying concentrations of IL-2, -15, -4, and -7 as  
436 well as time-course measurements of surface IL-2R $\beta$  upon IL-2 and -15 stimulation.  
437 YT-1 human NK cells were used for all data-sets involving IL-2 and IL-15. Human PBMC-  
438 derived CD4+TCR+CCR7<sup>high</sup> cells were used for all IL-4 and -7 response data. All YT-1  
439 cell experiments were performed both with the wild-type cell line, lacking IL-2R $\alpha$ , and  
440 cells sorted for expression of the receptor. Data from Ring *et al* and Gonnord *et al* can  
441 be found in Figure 5 and Figure S3 of each paper, respectively.<sup>14,27</sup> Measurements of  
442 receptor counts at steady state in Gonnord *et al* were used to solve for IL-7R $\alpha$ , IL-4R $\alpha$ ,  
443 and  $\gamma_c$  expression rates in human PBMCs.

444 Fitting was performed with the Python package PyMC3. All unknown rate parameters  
445 were assumed to have a lognormal distribution with a standard deviation of 0.1; the  
446 only exception to these distributions was  $f_{\text{sort}}$  which was assumed to have a beta dis-  
447 tribution with shape parameters of  $\alpha=20$  and  $\beta=40$ . Executing this fitting process  
448 yielded likelihood distributions of each unknown parameter and sum of squared error  
449 between model prediction and experimental data at each point of experimental data.  
450 The Geweke criterion metric was used to verify fitting convergence for all versions of  
451 the model (Fig. S2).<sup>59</sup>

## 452 **Tensor Generation and Factorization**

453 To perform tensor factorization we generated a three- (timepoints  $\times$  cell types  $\times$  ligand)  
454 or four-dimensional (timepoints  $\times$  cell types  $\times$  concentration  $\times$  mutein) data tensor  
455 of predicted or measured ligand-induced signaling. Before decomposition, the tensor  
456 was variance scaled across each cell population. Tensor decomposition was performed  
457 using the Python package TensorLy.<sup>60</sup> Except where indicated otherwise, tensor decom-  
458 position was performed using non-negative canonical polyadic decomposition. Where  
459 indicated, non-negative Tucker decomposition was used.

## 460 **Experimental Methods**

### 461 **Receptor abundance quantitation**

462 Cryopreserved PBMCs (ATCC, PCS-800-011, lot#81115172) were thawed to room  
463 temperature and slowly diluted with 9 mL pre-warmed RPMI-1640 medium (Gibco,  
464 11875-093) supplemented with 10% fetal bovine serum (FBS, Seradigm, 1500-500,  
465 lot#322B15). Media was removed, and cells washed once more with 10 mL warm  
466 RPMI-1640 + 10% FBS. Cells were brought to  $1.5 \times 10^6$  cells/mL, distributed at 250,000  
467 cells per well in a 96-well V-bottom plate, and allowed to recover 2 hrs at 37°C in  
468 an incubator at 5% CO<sub>2</sub>. Cells were then washed twice with PBS + 0.1% BSA (PBSA,  
469 Gibco, 15260-037, Lot#2000843) and suspended in 50 µL PBSA + 10% FBS for 10 min  
470 on ice to reduce background binding to IgG.

471 Antibodies were diluted in PBSA + 10% FBS and cells were stained for 1 hr at 4°C  
472 in darkness with a gating panel (Panel 1, Panel 2, Panel 3, or Panel 4) and one anti-  
473 receptor antibody, or an equal concentration of matched isotype/fluorochrome control  
474 antibody. Stain for CD25 was included in Panel 1 when CD122, CD132, CD127, or  
475 CD215 was being measured (CD25 is used to separate T<sub>reg</sub>s from other CD4+ T cells).

476 Compensation beads (Simply Cellular Compensation Standard, Bangs Labs, 550,  
477 lot#12970) and quantitation standards (Quantum Simply Cellular anti-Mouse IgG  
478 or anti-Rat IgG, Bangs Labs, 815, Lot#13895, 817, Lot#13294) were prepared for  
479 compensation and standard curve. One well was prepared for each fluorophore with  
480 2 µL antibody in 50 µL PBSA and the corresponding beads. Bead standards were  
481 incubated for 1 hr at room temperature in the dark.

482 Both beads and cells were washed twice with PBSA. Cells were suspended in 120 µL  
483 per well PBSA, and beads to 50 µL, and analyzed using an IntelliCyt iQue Screener  
484 PLUS with VBR configuration (Sartorius) with a sip time of 35 and 30 secs for cells and  
485 beads, respectively. Antibody number was calculated from fluorescence intensity by  
486 subtracting isotype control values from matched receptor stains and calibrated using  
487 the two lowest binding quantitation standards. T<sub>reg</sub> cells could not be gated in the  
488 absence of CD25, so CD4+ T cells were used as the isotype control to measure CD25 in  
489 T<sub>reg</sub> populations. Cells were gated as shown in Fig. S3. Measurements were performed



490 using four independent staining procedures over two days. Separately, the analysis  
491 was performed with anti-receptor antibodies at 3x normal concentration to verify that  
492 receptor binding was saturated. Replicates were summarized by geometric mean.

### 493 **pSTAT5 Measurement of IL-2 and -15 Signaling in PBMCs**

494 Human PBMCs were thawed, distributed across a 96-well plate, and allowed to recover  
495 as described above. IL-2 (R&D Systems, 202-IL-010) or IL-15 (R&D Systems, 247-ILB-  
496 025) were diluted in RPMI-1640 without FBS and added to the indicated concentrations.  
497 To measure pSTAT5, media was removed, and cells fixed in 100  $\mu$ L of 10% formalin  
498 (Fisher Scientific, SF100-4) for 15 mins at room temperature. Formalin was removed,  
499 cells were placed on ice, and cells were gently suspended in 50  $\mu$ L of cold methanol  
500 (-30°C). Cells were stored overnight at -30°C. Cells were then washed twice with PBSA,  
501 split into two identical plates, and stained 1 hr at room temperature in darkness using  
502 antibody panels 4 and 5 with 50  $\mu$ L per well. Cells were suspended in 100  $\mu$ L PBSA  
503 per well, and beads to 50  $\mu$ L, and analyzed on an IntelliCyt iQue Screener PLUS with  
504 VBR configuration (Sartorius) using a sip time of 35 seconds and beads 30 seconds.  
505 Compensation was performed as above. Populations were gated as shown in Fig. S3,  
506 and the median pSTAT5 level extracted for each population in each well.

### 507 **Recombinant proteins**

508 IL-2/Fc fusion proteins were expressed using the Expi293 expression system accord-  
509 ing to manufacturer instructions (Thermo Scientific). Proteins were as human IgG1  
510 Fc fused at the N- or C-terminus to human IL-2 through a (G4S)<sub>4</sub> linker. C-terminal  
511 fusions omitted the C-terminal lysine residue of human IgG1. The AviTag sequence  
512 GLNDIFEAQKIEWHE was included on whichever terminus did not contain IL-2. Fc mu-  
513 tations to prevent dimerization were introduced into the Fc sequence.<sup>61</sup> Proteins were  
514 purified using MabSelect resin (GE Healthcare). Proteins were biotinylated using BirA  
515 enzyme (BPS Biosciences) according to manufacturer instructions, and extensively  
516 buffer-exchanged into phosphate buffered saline (PBS) using Amicon 10 kDa spin con-  
517 centrators (EMD Millipore). The sequence of IL-2R $\beta$ / $\gamma$  Fc heterodimer was based on a  
518 reported active heterodimeric molecule (patent application US20150218260A1), with

519 the addition of (G4S)<sub>2</sub> linker between the Fc and each receptor ectodomain. The pro-  
520 tein was expressed in the Expi293 system and purified on MabSelect resin as above.  
521 IL2-R $\alpha$  ectodomain was produced with C-terminal 6xHis tag and purified on Nickel-NTA  
522 spin columns (Qiagen) according to manufacturer instructions.

### 523 **Octet binding assays**

524 Binding affinity was measured on an OctetRED384 (ForteBio). Briefly, biotinylated  
525 monomeric IL-2/Fc fusion proteins were uniformly loaded to Streptavidin biosensors  
526 (ForteBio) at roughly 10% of saturation point and equilibrated for 10 minutes in PBS  
527 + 0.1% bovine serum albumin (BSA). Association time was up to 40 minutes in IL-  
528 2R $\beta$ / $\gamma$  titrated in 2x steps from 400 nM to 6.25 nM, or IL-2R $\alpha$  from 25 nM to 20 pM,  
529 followed by dissociation in PBS + 0.1% BSA. A zero-concentration control sensor was  
530 included in each measurement and used as a reference signal. Assays were performed  
531 in quadruplicate across two days. Binding to IL-2R $\alpha$  did not fit to a simple binding model  
532 so equilibrium binding was used to determine the  $K_D$  within each assay. Binding to IL-  
533 2R $\beta$ / $\gamma$  fit a 1:1 binding model so on-rate ( $k_{on}$ ), off-rate ( $k_{off}$ ) and  $K_D$  were determined  
534 by fitting to the entire binding curve. Kinetic parameters and  $K_D$  were calculated for  
535 each assay by averaging all concentrations with detectable binding signal (typically  
536 12.5 nM and above).

### 537 **Acknowledgements**

538 This work was supported by NIH DP5-OD019815 to A.S.M. and by a research agreement  
539 with Visterra Inc. **Competing financial interests:** S.M.C. and C.P. are employees of  
540 Visterra Inc.

### 541 **Author contributions statement**

542 A.S.M. and S.M.C. conceived of the study. S.M.C. and C.P. performed the PBMC ex-  
543 periments and engineered the IL-2 fusion proteins. A.C.W., A.M.F., A.S.M, B.O.J., and  
544 Z.S.K. performed the computational analysis. All authors helped to design experiments  
545 and/or analyze the data.

546 **Supplement**

547 **IL-2, IL-15, and IL-7 Receptor Quantitation**

Table S1: **Antibodies used to quantify receptors and cell types.** *Panel 0:* Antibodies for IL-2, IL-15, and IL-7 receptor analysis; *Panel 1:* Antibodies to gate Naïve and Memory T-regulatory and T-helper cells; *Panel 2:* Antibodies to gate NK and CD56bright NK cells; *Panel 3:* Antibodies to gate Naïve and Memory Cytotoxic T cells; *Panel 4:* Antibodies to gate Naïve and Memory T-regulatory, T helper, and Cytotoxic cells, and NK cells for CD127 (IL-7) Quantitation; *Panel 5:* Antibodies to gate Memory and Naïve T-regulatory cells, Memory and Naïve T-helper cells; *Panel 6:* Antibodies to gate NK cells, CD56bright NK cells, and Cytotoxic T cells. \*CST: Cell Signaling Technology.

| Antibody (clone)       | Dilution | Fluorophore          | Vendor (CAT#)          | Panel |
|------------------------|----------|----------------------|------------------------|-------|
| CD25 (M-A251)          | 1:120    | Brilliant Violet 421 | BioLegend (356114)     | 0     |
| CD122 (TU27)           | 1:120    | PE/Cy7               | BioLegend (339014)     | 0     |
| CD132 (TUGh4)          | 1:120    | APC                  | BioLegend (3386)       | 0     |
| CD215 1st mAb (JM7A4)  | 1:120    | APC                  | BioLegend (330210)     | 0     |
| CD215 2nd mAb (151303) | 3:100    | APC                  | R&D Systems (FAB1471A) | 0     |
| CD127 (A019D5)         | 1:120    | Alexa Fluor 488      | BioLegend (351313)     | 0     |
| Ms IgG1κ (MOPC-21)     | 1:240    | Brilliant Violet 421 | BioLegend (400158)     | 0     |
| Md IgG1κ (MOPC-21)     | 1:240    | PE/Cy7               | BioLegend (400126)     | 0     |
| Rat IgG2Bκ (RTK4530)   | 1:60     | APC                  | BioLegend (400612)     | 0     |
| Ms IgG2Bκ (MPC-11)     | 1:120    | APC                  | BioLegend (400320)     | 0     |
| Ms IgG2B (133303)      | 3:100    | APC                  | R&D Systems (IC0041A)  | 0     |
| Ms IgG1κ (MOPC-21)     | 1:120    | Alexa Fluor 488      | BioLegend (400129)     | 0     |
| CD3 (UCHT1)            | 1:120    | Brilliant Violet 605 | BioLegend (300460)     | 1     |
| CD4 (RPA-T4)           | 1:120    | Brilliant Violet 785 | BioLegend (300554)     | 1     |
| CD127 (A019D5)         | 1:120    | Alexa Fluor 488      | BioLegend (351313)     | 1     |
| CD45RA (HI100)         | 1:120    | PE/Dazzle 594        | BioLegend (304146)     | 1     |
| CD3 (UCHT1)            | 1:120    | Brilliant Violet 605 | BioLegend (300460)     | 2     |
| CD56 (5.1H11)          | 1:120    | PE/Dazzle 594        | BioLegend (362544)     | 2     |
| CD3 (UCHT1)            | 1:120    | Brilliant Violet 605 | BioLegend (300460)     | 3     |
| CD8 (RPA-T8)           | 1:120    | Brilliant Violet 785 | BioLegend (301046)     | 3     |
| CD45RA (HI100)         | 1:120    | PE/Dazzle 594        | BioLegend (304146)     | 3     |
| CD25 (M-A251)          | 1:120    | Brilliant Violet 421 | BioLegend (356114)     | 4     |

| Antibody (clone) | Dilution | Fluorophore          | Vendor (CAT#)      | Panel |
|------------------|----------|----------------------|--------------------|-------|
| CD3 (UCHT1)      | 1:120    | Brilliant Violet 605 | BioLegend (300460) | 4     |
| CD4 (RPA-T4)     | 1:120    | Brilliant Violet 785 | BioLegend (300554) | 4     |
| CD127 (A019D5)   | 1:120    | Alexa Fluor 488      | BioLegend (351313) | 4     |
| CD45RA (HI100)   | 1:120    | PE/Dazzle 594        | BioLegend (304146) | 4     |
| CD56 (5.1H11)    | 1:120    | PE/Cy7               | BioLegend (362510) | 4     |
| CD8 (RPA-T8)     | 1:120    | Alexa Fluor 647      | BioLegend (301062) | 4     |
| Foxp3 (259D)     | 1:50     | Alexa Fluor 488      | BioLegend (320212) | 5     |
| CD25 (M-A251)    | 1:120    | Brilliant Violet 421 | BioLegend (356114) | 5     |
| CD4 (SK3)        | 1:120    | Brilliant Violet 605 | BioLegend (344646) | 5     |
| CD45RA (HI100)   | 1:120    | PE/Dazzle 594        | BioLegend (304146) | 5     |
| pSTAT5 (C71E5)   | 1:120    | Alexa Fluor 647      | CST* (9365)        | 5     |
| CD3 (UCHT1)      | 1:120    | Brilliant Violet 605 | BioLegend (300460) | 6     |
| CD8 (RPA-T8)     | 1:120    | Alexa Fluor 647      | BioLegend (301062) | 6     |
| CD56 (5.1H11)    | 1:120    | Alexa Fluor 488      | BioLegend (362518) | 6     |
| pSTAT5 (D4737)   | 1:120    | PE                   | CST* (14603)       | 6     |

548 **IL-2 variants' mutations and conjugations**

Table S2: **Modified IL-2 ligands and their respective mutations, and Fc conjugations.**

| Ligand      | Fc Conjugation | Specificity Mutation | Other Mutations |
|-------------|----------------|----------------------|-----------------|
| F42Q N-Term | N-Terminus     | F42Q                 | V69A/Q74P/C125S |
| N88D C-term | C-Terminus     | N88D                 | C125A           |
| R38Q N-term | N-Terminus     | R38Q                 | V69A/Q74P/C125S |
| V91K C-term | C-Terminus     | V91K                 | C125A           |
| WT C-term   | C-Terminus     | Wild-type            | C125A           |
| WT N-term   | C-Terminus     | Wild-type            | V69A/Q74P/C125S |

549 **IL-2 variants' IL-2R $\beta$ / $\gamma_c$  affinities**

550 Data Table SD1: **IL-2R $\beta$ / $\gamma_c$  binding affinities of mutant and modified cytokines.**

551 Data from the BLI studies for each IL-2 mutein.

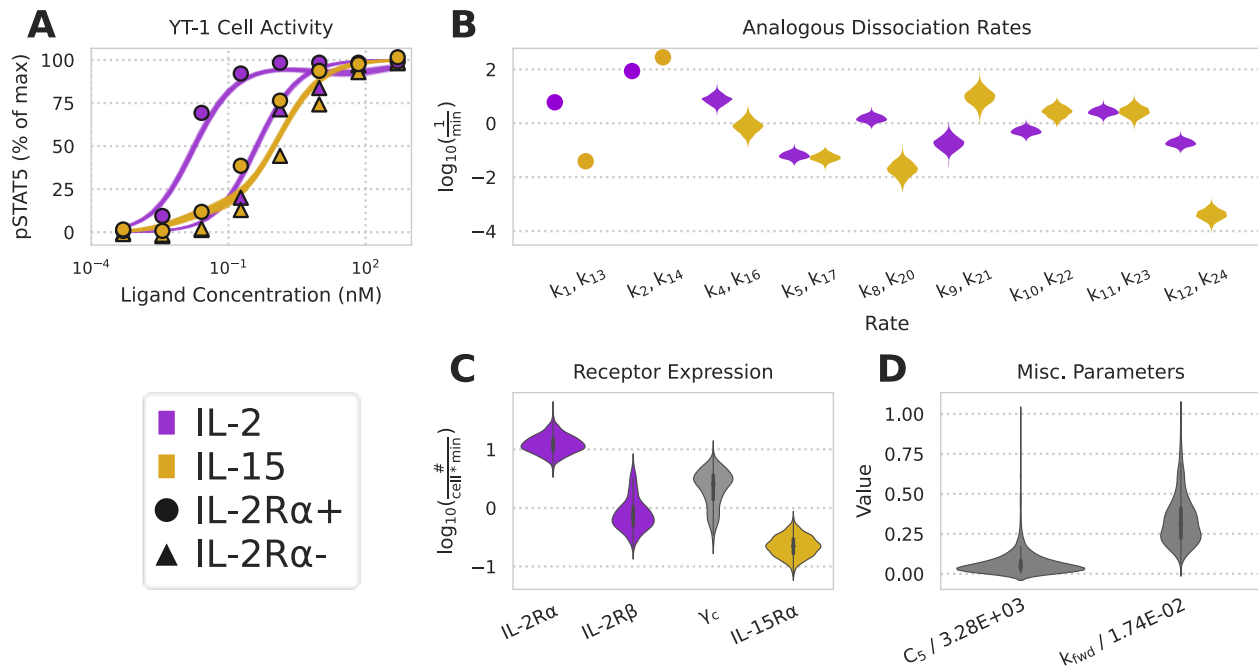

Figure S1: **Model without trafficking fails to capture IL-2/-15 dose response.** A) Model without trafficking fit to IL-2 and IL-15 pSTAT5 dose response data.<sup>14</sup> This model was not fit to the surface IL-2R $\beta$  measurements since no receptors were allowed to internalize from the cell surface (Fig. 1B-D). B) Posterior distributions of analogous reverse reaction rates for IL-2 and IL-15 in no-trafficing model. C) Posterior distributions for receptor surface abundance in no-trafficing model. D) Posterior distribution for the pSTAT5 activity scaling constant in no-trafficing model.



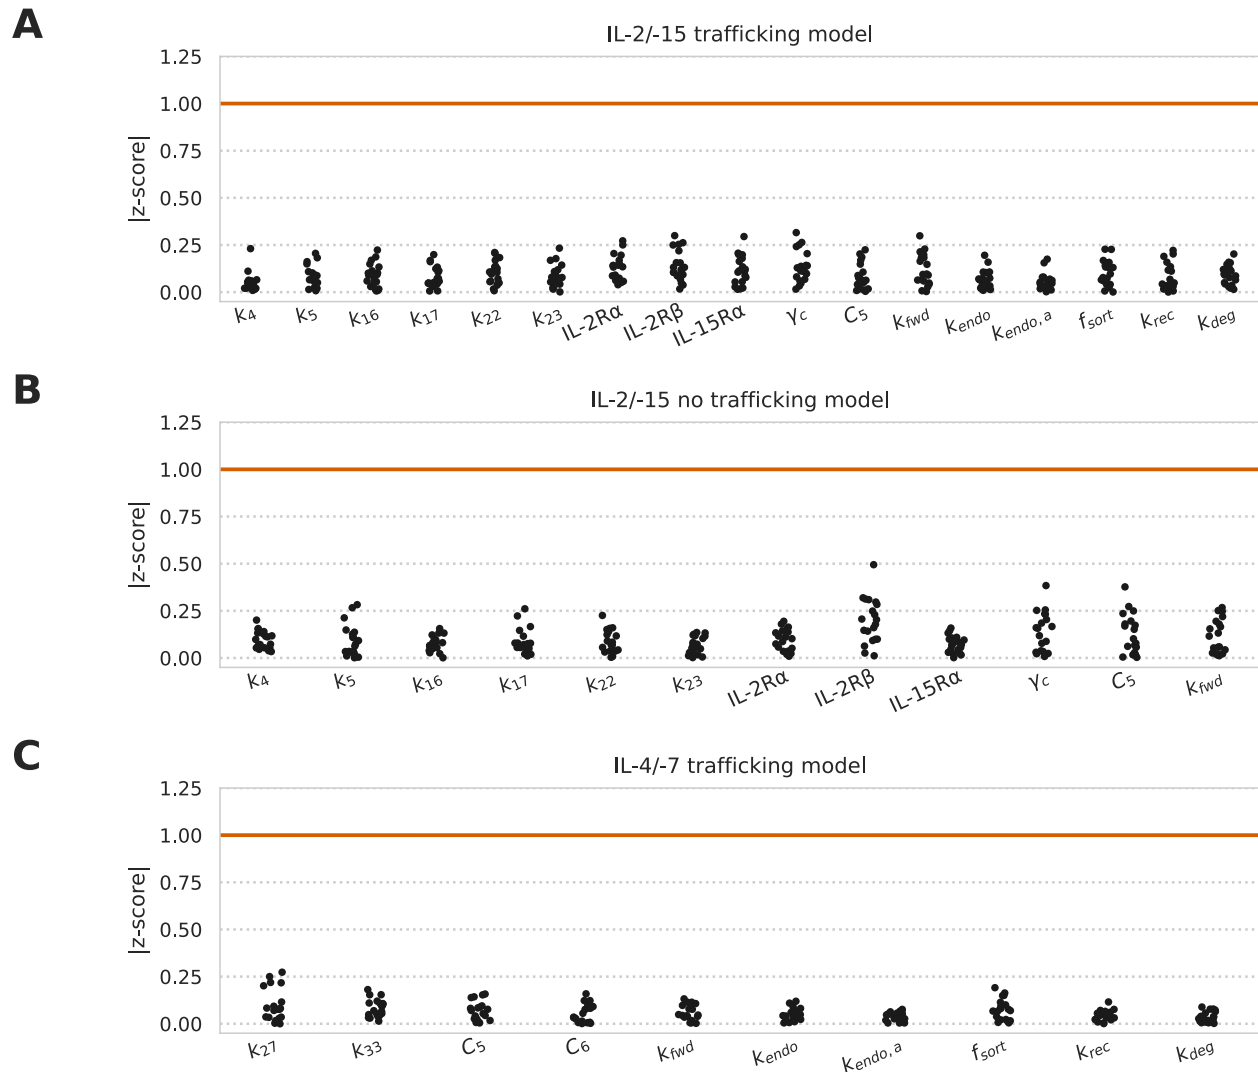

Figure S2: **Geweke criterion scores for model fitting with and without trafficking.** Geweke criterion z-scores in all subplots were calculated using 20 intervals in the first 10% and last 50% of MCMC chain. Scores of  $|z| < 1$  imply fitting convergence. A-B) IL-2/-15 with and without trafficking. C) IL-4/-7 with trafficking (Fig. S1).

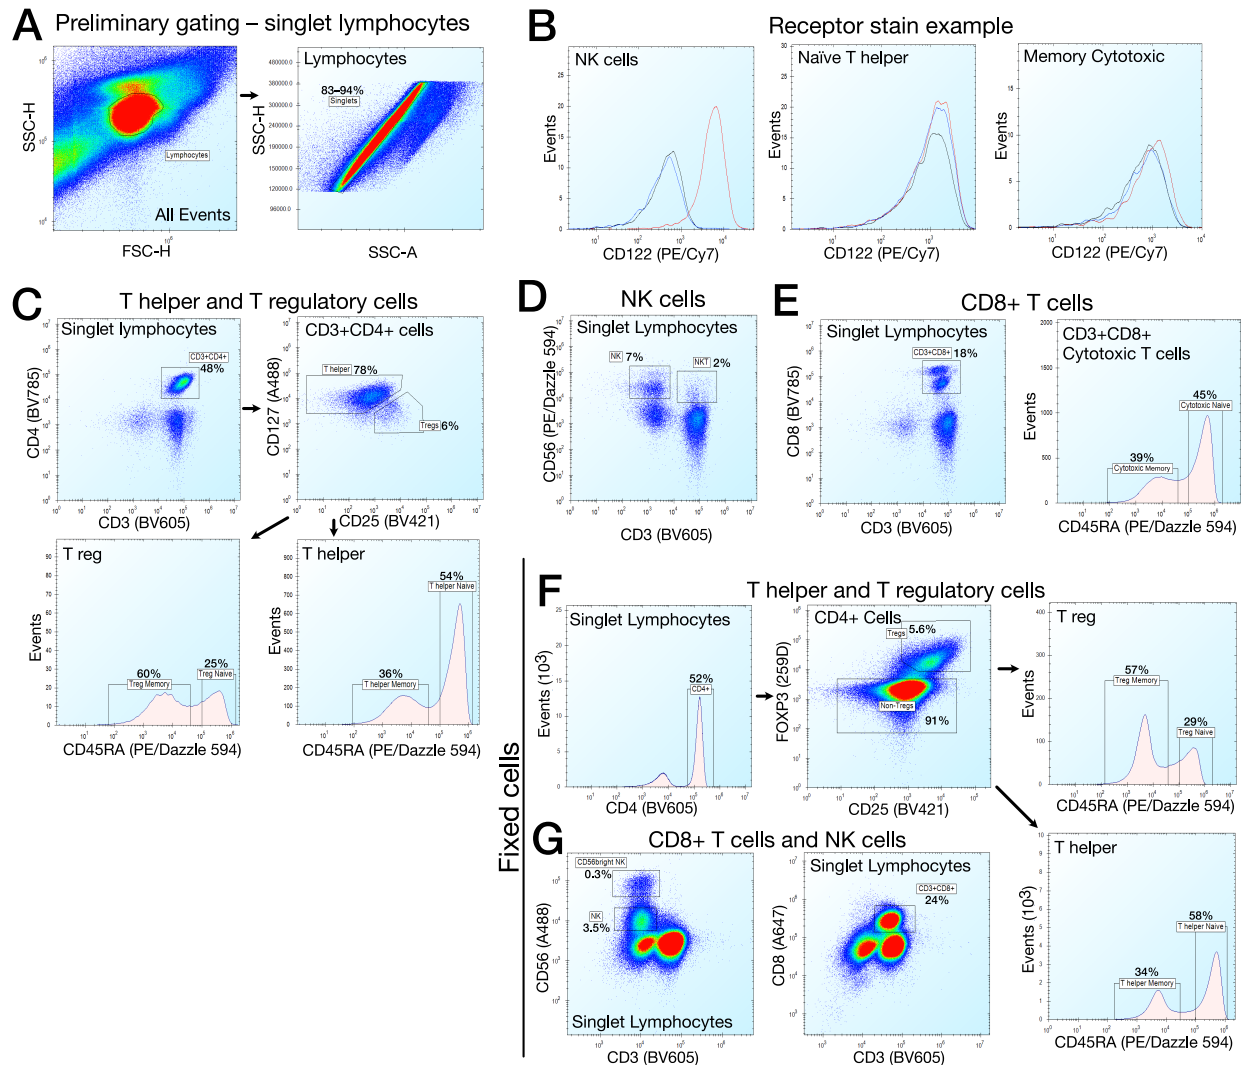

Figure S3: **Receptor quantification and gating of PBMC-derived immune cell types.** A) Preliminary gating for single lymphocytes. B) Example staining for CD122 (red), the corresponding isotype control (blue), and unstained cells (black). C) Gating for live T helper and T regulatory cells during receptor quantification. D) Live cell NK cell gating. E) Live cell CD8+ T cell gating. F) Gating for fixed T helper and T regulatory cells during pSTAT5 quantification. G) Fixed CD8+ T cell and NK cell gating.

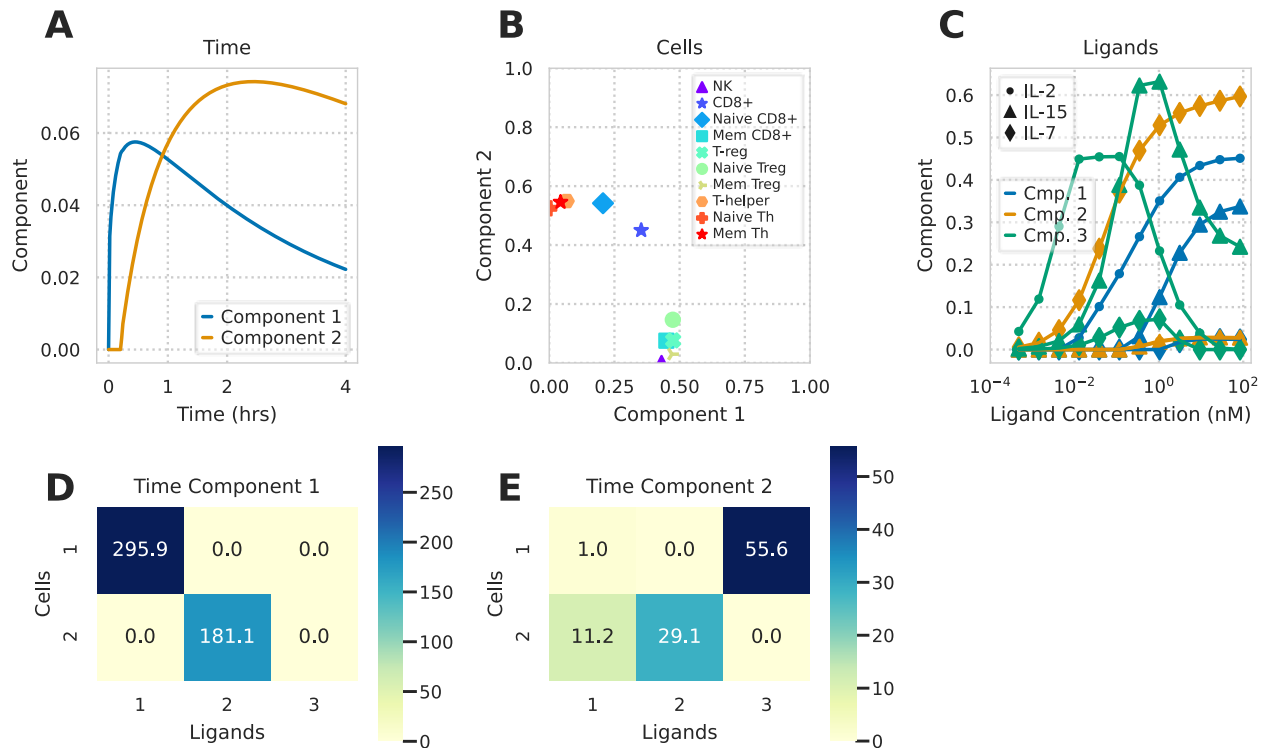

Figure S4: **Tucker factorization of predicted immune cell type responses.** A) Timepoint decomposition plot showing factorization component values against time after decomposing the tensor's first dimension into 2 components. B) Decomposition plot along the second (cell) dimension after decomposing it to 2 components showing the ten cell type values along each component. C) Ligand decomposition plot along the tensor's third dimension after decomposing it into 3 components. D-E) Slices of the Tucker core tensor corresponding to time component 1 (D) and 2 (E).

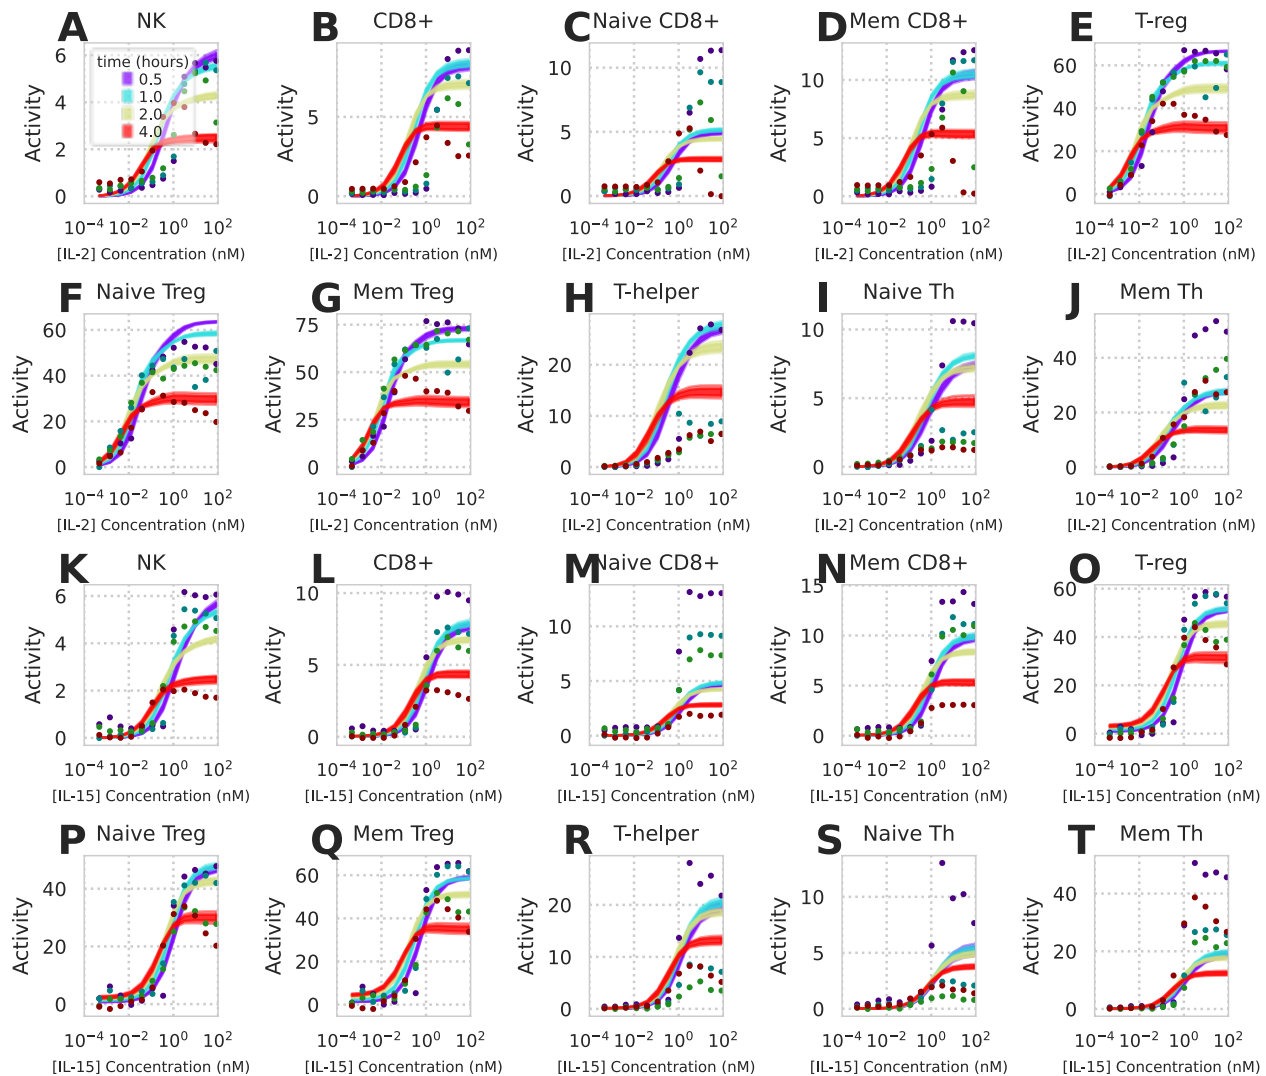

Figure S5: **Full panel of predicted versus actual immune cell type responses.** Dots represent experimental measurements and shaded regions represent 10-90% confidence interval for model predictions. Time of pSTAT5 activity measurement is denoted by color. All cell populations were stimulated with either IL-2 (A-J) or IL-15 (K-T).

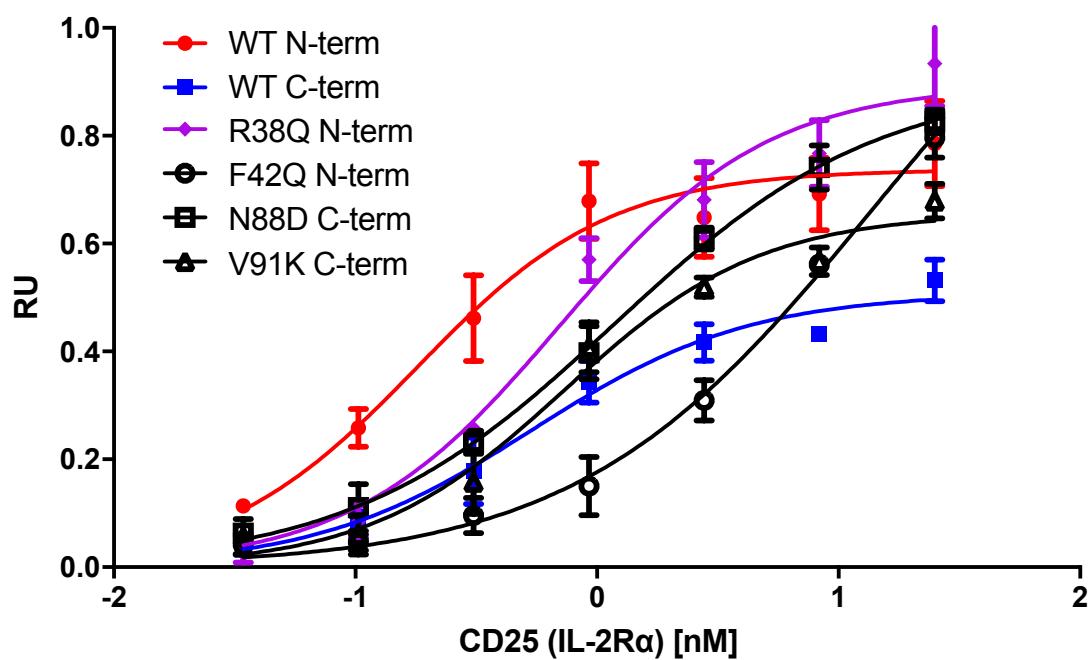

Figure S6: **Cytokine affinity measurements to IL-2R $\alpha$ .** Binding is quantified in relative units.

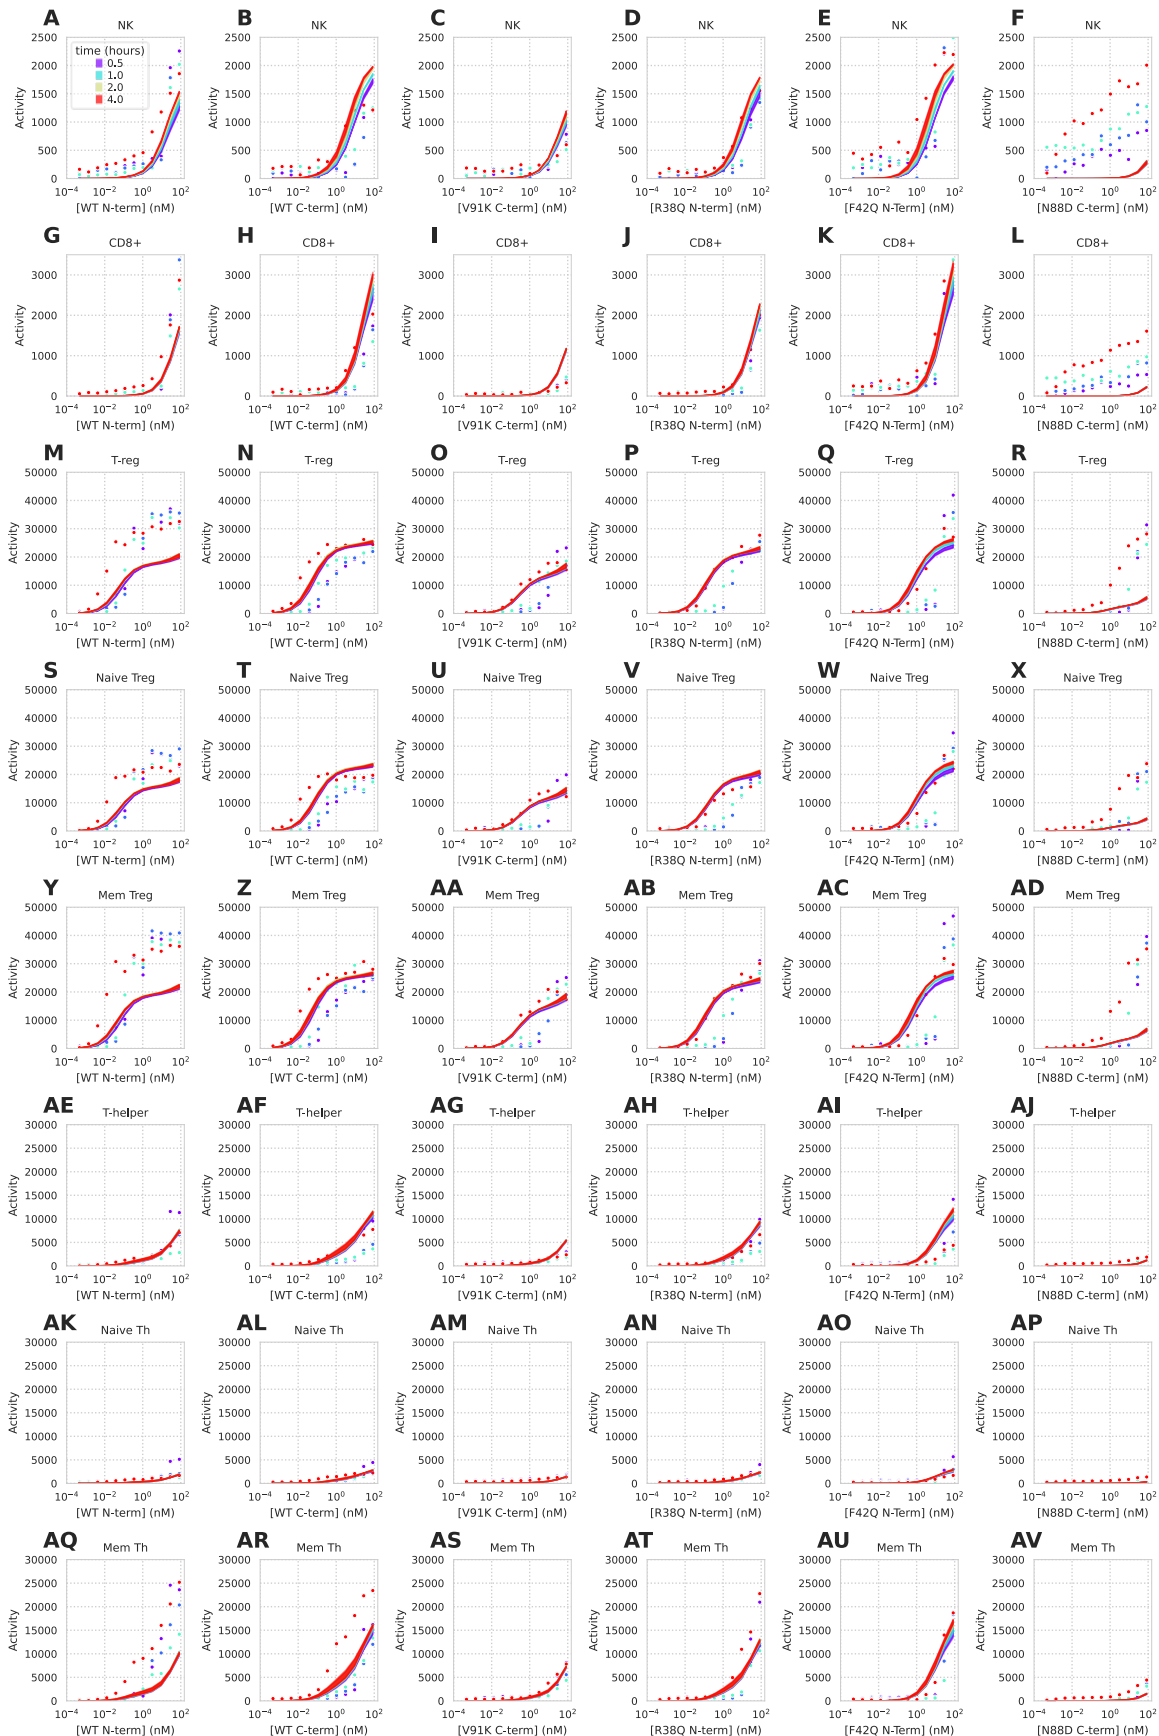

Figure S7: **Full panel of predicted versus actual immune cell type responses to IL-2 muteins.** Dots represent experimental measurements and shaded regions represent 10-90% confidence interval for model predictions. Time of pSTAT5 activity measurement is denoted by color. Cell populations were stimulated with IL-2 muteins of varying IL-2R $\alpha$  and IL-2R $\beta/\gamma_c$  binding affinities.

## 552 **References**

- 553 1. Rochman, Y., Spolski, R. & Leonard, W. New insights into the regulation of T cells by  
554  $\gamma$ c family cytokines. *Nature Reviews Immunology* **9**, 480–490 (2009).
- 555 2. Leonard, W. J., Lin, J.-X. & O’Shea, J. J. The  $\gamma$ c family of cytokines: Basic biology to  
556 therapeutic ramifications. *Immunity* **50**, 832–850 (2019).
- 557 3. Walsh, S. T. R. A biosensor study indicating that entropy, electrostatics, and recep-  
558 tor glycosylation drive the binding interaction between interleukin-7 and its receptor.  
559 *Biochemistry* **49**, 8766–8778 (2010).
- 560 4. Amorosi, S. *et al.* The cellular amount of the common  $\gamma$ -chain influences sponta-  
561 neous or induced cell proliferation. *The Journal of Immunology* **182**, 3304–3309 (2009).
- 562 5. Vigliano, I. *et al.* Role of the common  $\gamma$  chain in cell cycle progression of human  
563 malignant cell lines. *International Immunology* **24**, 159–167 (2012).
- 564 6. Wang, L. *et al.* Key role for IL-21 in experimental autoimmune uveitis. *Proceedings*  
565 *of the National Academy of Sciences* **108**, 9542–9547 (2011).
- 566 7. Sharma, R. *et al.* Cutting edge: A regulatory t cell-dependent novel function of CD25  
567 (IL-2R $\alpha$ ) controlling memory CD8+ T cell homeostasis. *The Journal of Immunology* **178**,  
568 1251–1255 (2007).
- 569 8. Sharfe, N., Dadi, H. K., Shahar, M. & Roifman, C. M. Human immune disorder arising  
570 from mutation of the  $\alpha$  chain of the interleukin-2 receptor. *Proceedings of the National*  
571 *Academy of Sciences* **94**, 3168–3171 (1997).
- 572 9. Horak, I. Immunodeficiency in il-2-knockout mice. *Clin Immunol Immunopathol* **76**,  
573 S172–3
- 574 10. Human il2ra null mutation mediates immunodeficiency with lymphoproliferation  
575 and autoimmunity. *Clinical Immunology* **146**, 248–261 (2013).
- 576 11. Stephanie R. Pulliam, S. E. A., Roman V. Uzhachenko & Shanker, A. Common  
577 gamma chain cytokines in combinatorial immune strategies against cancer. *Immunol-*  
578 *ogy letters* **169**, 61–72 (2015).



- 579 12. Bentebibel, S.-E. *et al.* A first-in-human study and biomarker analysis of NKTR-  
580 214, a novel IL-2-receptor beta/gamma ( $\beta\gamma$ )-biased cytokine, in patients with advanced  
581 or metastatic solid tumors. *Cancer Discovery* (2019). doi:10.1158/2159-8290.CD-18-  
582 1495
- 583 13. Zhu, E. F. *et al.* Synergistic innate and adaptive immune response to combination  
584 immunotherapy with anti-tumor antigen antibodies and extended serum half-life il-2.  
585 *Cancer Cell* **27**, 489–501
- 586 14. Ring, A. M. *et al.* Mechanistic and structural insight into the functional dichotomy  
587 between IL-2 and IL-15. *Nature Immunology* **13**, 1187–1195 (2012).
- 588 15. Cotari, J. W., Voisinne, G., Dar, O. E., Karabacak, V. & Altan-Bonnet, G. Cell-to-cell  
589 variability analysis dissects the plasticity of signaling of common  $\gamma$  chain cytokines in  
590 T cells. *Science Signaling* **6**, ra17–ra17 (2013).
- 591 16. Krieg, C., Letourneau, S., Pantaleo, G. & Boyman, O. Improved IL-2 immunotherapy  
592 by selective stimulation of IL-2 receptors on lymphocytes and endothelial cells. *Proc*  
593 *Natl Acad Sci U S A* **107**, 11906–11911
- 594 17. Konrad, M. W. *et al.* Pharmacokinetics of recombinant interleukin 2 in humans.  
595 *Cancer Research* **50**, 2009–2017 (1990).
- 596 18. Bernett, M. J. *et al.* Abstract 1595: IL-15/IL-15R $\alpha$  heterodimeric Fc-fusions with  
597 extended half-lives. *Cancer Research* **77**, 1595–1595 (2017).
- 598 19. Donohue, J. H. & Rosenberg, S. A. The fate of interleukin-2 after in vivo administra-  
599 tion. *The Journal of Immunology* **130**, 2203–2208 (1983).
- 600 20. William G. Berndt, K. A. S., David Z. Chang & Ciardelli, T. L. Mutagenic analysis of  
601 a receptor contact site on interleukin-2: Preparation of an IL-2 analog with increased  
602 potency. *Biochemistry* **33**, 6571–6577
- 603 21. Collins, L. *et al.* Identification of specific residues of human interleukin 2 that affect  
604 binding to the 70-kDa subunit (p70) of the interleukin 2 receptor. *Proceedings of the*  
605 *National Academy of Sciences* **85**, 7709–7713 (1988).
- 606 22. Aron M. Levin, A. M. R., Darren L. Bates. Exploiting a natural conformational switch  
607 to engineer an interleukin-2 ‘superkine’. *Nature* **484**, 529–533 (2012).

- 608 23. Bell, C. J. M. *et al.* Sustained *in vivo* signaling by long-lived IL-2 induces prolonged  
609 increases of regulatory T cells. *Journal of Autoimmunity* **56**, 66–80 (2015).
- 610 24. Peterson, L. B. *et al.* A long-lived IL-2 mutein that selectively activates and expands  
611 regulatory T cells as a therapy for autoimmune disease. *Journal of Autoimmunity* **95**,  
612 1–14 (2018).
- 613 25. Burke, M. A. *et al.* Modeling the proliferative response of T cells to IL-2 and IL-4.  
614 *Cellular Immunology* **178**, 42–52 (1997).
- 615 26. Feinerman, O. *et al.* Single-cell quantification of IL-2 response by effector and  
616 regulatory T cells reveals critical plasticity in immune response. *Molecular Systems*  
617 *Biology* **6**, (2010).
- 618 27. Gonnord, P. *et al.* A hierarchy of affinities between cytokine receptors and the  
619 common gamma chain leads to pathway cross-talk. *Science Signaling* **11**, (2018).
- 620 28. Duprez, V., Cornet, V. & Dautry-Varsat, A. Down-regulation of high affinity inter-  
621 leukin 2 receptors in a human tumor T cell line. Interleukin 2 increases the rate of  
622 surface receptor decay. *Journal of Biological Chemistry* **263**, 12860–12865 (1988).
- 623 29. Lamaze, C. *et al.* Interleukin 2 receptors and detergent-resistant membrane do-  
624 mains define a clathrin-independent endocytic pathway. *Molecular Cell* **7**, 661–671  
625 (2001).
- 626 30. Eubelen, M. *et al.* A molecular mechanism for Wnt ligand-specific signaling. *Sci-*  
627 *ence* **361**, (2018).
- 628 31. Li, P. *et al.* Morphogen gradient reconstitution reveals Hedgehog pathway design  
629 principles. *Science* **360**, 543–548 (2018).
- 630 32. Antebi, Y. E., Nandagopal, N. & Elowitz, M. B. An operational view of intercellular  
631 signaling pathways. *Current Opinion in Systems Biology* **1**, 16–24 (2017).
- 632 33. Antebi, Y. E. *et al.* Combinatorial signal perception in the BMP pathway. *Cell* **170**,  
633 1184–1196
- 634 34. Fallon, E. M. & Lauffenburger, D. A. Computational model for effects of lig-  
635 and/receptor binding properties on interleukin-2 trafficking dynamics and T cell

- 636 proliferation response. *Biotechnology Progress* **16**, 905–916
- 637 35. Fallon, E. M., Liparoto, S. F., Lee, K. J., Ciardelli, T. L. & Lauffenburger, D. A. Increased  
638 endosomal sorting of ligand to recycling enhances potency of an interleukin-2 analog.  
639 *Journal of Biological Chemistry* **275**, 6790–6797 (2000).
- 640 36. Basquin, C. *et al.* The signalling factor PI3K is a specific regulator of the clathrin-  
641 independent dynamin-dependent endocytosis of IL-2 receptors. *Journal of Cell Science*  
642 **126**, 1099–1108 (2013).
- 643 37. Volkó, J. *et al.* IL-2 receptors preassemble and signal in the er/golgi causing resis-  
644 tance to antiproliferative anti-il-2R $\alpha$  therapies. *Proceedings of the National Academy*  
645 *of Sciences* **116**, 21120–21130 (2019).
- 646 38. Mitra, S. *et al.* Interleukin-2 activity can be fine tuned with engineered receptor  
647 signaling clamps. *Immunity* **42**, 826–838 (2015).
- 648 39. Spangler, J. B. *et al.* Antibodies to interleukin-2 elicit selective T cell subset poten-  
649 tiation through distinct conformational mechanisms. *Immunity* **42**, 815–825 (2015).
- 650 40. Hassan, J. & Reen, D. J. IL-7 promotes the survival and maturation but not differ-  
651 entiation of human post-thymic CD4+ T cells. *European journal of immunology* **28**,  
652 3057–3065 (1998).
- 653 41. Tucker, L. R. Some mathematical notes on three-mode factor analysis. *Psychome-*  
654 *trika* **31**, 279–311 (1966).
- 655 42. Junghans, R. P. & Waldmann, T. A. Metabolism of tac (IL2R $\alpha$ ): Physiology of cell  
656 surface shedding and renal catabolism, and suppression of catabolism by antibody  
657 binding. *Journal of Experimental Medicine* **183**, 1587–1602 (1996).
- 658 43. Kuwabara, T., Kasai, H. & Kondo, M. Acetylation modulates IL-2 receptor signaling  
659 in T cells. *Journal of Immunology* **197**, 4334–4343 (2016).
- 660 44. Casim A. Sarkar, T. H., Ky Lowenhaupt. Rational cytokine design for increased life-  
661 time and enhanced potency using pH-activated ‘histidine switching’. *Nature Biotech-*  
662 *nology* **20**, 908–913 (2002).
- 663 45. Haugh, J. M. Mathematical model of human growth hormone (hGH)-stimulated cell

664 proliferation explains the efficacy of hGH variants as receptor agonists or antagonists.  
665 *Biotechnology Progress* **20**, 1337–1344

666 46. Meyer, A. S., Zweemer, A. J. & Lauffenburger, D. A. The AXL receptor is a sensor of  
667 ligand spatial heterogeneity. *Cell Systems* **1**, 25–36 (2015).

668 47. Leon, K., Garcia-Martinez, K. & Carmenate, T. Mathematical models of the impact of  
669 IL-2 modulation therapies on T cell dynamics. *Frontiers in Immunology* **4**, 439 (2013).

670 48. Komorowski, M. & Tawfik, D. S. The limited information capacity of cross-reactive  
671 sensors drives the evolutionary expansion of signaling. *Cell Systems* **8**, 76–85.e6  
672 (2019).

673 49. Robinett, R. A. *et al.* Dissecting fcγr regulation through a multivalent binding model.  
674 *Cell Systems* (2018). doi:10.1016/j.cels.2018.05.018

675 50. Voss, S. D., Leary, T. P., Sondel, P. M. & Robb, R. J. Identification of a direct interac-  
676 tion between interleukin 2 and the p64 interleukin 2 receptor gamma chain. *Proceed-*  
677 *ings of the National Academy of Sciences* **90**, 2428–2432 (1993).

678 51. Walsh, S. T. R. Structural insights into the common γ-chain family of cytokines and  
679 receptors from the interleukin-7 pathway. *Immunological Reviews* **250**, 303–316

680 52. Renaud, J. C. *et al.* Expression cloning of the murine and human interleukin 9  
681 receptor cDNAs. *Proceedings of the National Academy of Sciences* **89**, 5690–5694  
682 (1992).

683 53. Rickert, M., J Boulanger, M., Goriatcheva, N. & Christopher Garcia, K. Compens-  
684 atory energetic mechanisms mediating the assembly of signaling complexes between  
685 interleukin-2 and its α, β, and γc receptors. *Journal of molecular biology* **339**, 1115–28  
686 (2004).

687 54. Mortier, E. *et al.* Soluble interleukin-15 receptor α (IL-15Rα)-sushi as a selective  
688 and potent agonist of IL-15 action through IL-15Rβ/γ: Hyperagonist IL-15·IL-15Rα fu-  
689 sion proteins. *Journal of Biological Chemistry* **281**, 1612–1619 (2006).

690 55. Dubois, S., Mariner, J., Waldmann, T. A. & Tagaya, Y. IL-15Rα recycles and presents  
691 IL-15 in *trans* to neighboring cells. *Immunity* **17**, 537–547 (2002).

- 692 56. Hindmarsh, A. C. *et al.* SUNDIALS: Suite of nonlinear and differential/algebraic  
693 equation solvers. *ACM Transactions on Mathematical Software (TOMS)* **31**, 363–396  
694 (2005).
- 695 57. Cao, Y., Li, S. & Petzold, L. Adjoint sensitivity analysis for differential-algebraic  
696 equations: Algorithms and software. *Journal of Computational and Applied Mathemat-*  
697 *ics* **149**, 171–191 (2002).
- 698 58. Hogan, R. J. Adept 2.0: a combined automatic differentiation and array library for  
699 C++. (2017). doi:10.5281/zenodo.1004730
- 700 59. Geweke, J. Evaluating the accuracy of sampling-based approaches to the calcula-  
701 tion of posterior moments. in *Bayesian statistics 4* 169–193 (University Press, 1992).
- 702 60. Kossaifi, J., Panagakis, Y. & Pantic, M. TensorLy: Tensor learning in Python. *CoRR*  
703 **abs/1610.09555**, (2016).
- 704 61. Ishino, T. *et al.* Engineering a monomeric Fc domain modality by N-glycosylation  
705 for the half-life extension of biotherapeutics. *Journal of Biological Chemistry* **22**, 473–  
706 482 (2013).
